# Supplementary material for: The MAPK-Signaling Pathway in Colorectal Cancer: Dysregulated Genes and Their Association With MicroRNAs
Source: PubMed Central journal article supplement (PMC5888819; doi:10.1177/1176935118766522), 2018-03-26
Supplement: Supplemental_Tables.pdf [file Supplemental_Tables.pdf]

Supplemental Table S1. Genes identified and analyzed in KEGG MAPK Signaling Pathway

| Gene ID | Gene Name       | Description                                                                      |
|---------|-----------------|----------------------------------------------------------------------------------|
| 773     | <i>CACNA1A</i>  | calcium voltage-gated channel subunit alpha1 A [KO:K04344]                       |
| 774     | <i>CACNA1B</i>  | calcium voltage-gated channel subunit alpha1 B [KO:K04849]                       |
| 775     | <i>CACNA1C</i>  | calcium voltage-gated channel subunit alpha1 C [KO:K04850]                       |
| 776     | <i>CACNA1D</i>  | calcium voltage-gated channel subunit alpha1 D [KO:K04851]                       |
| 777     | <i>CACNA1E</i>  | calcium voltage-gated channel subunit alpha1 E [KO:K04852]                       |
| 778     | <i>CACNA1F</i>  | calcium voltage-gated channel subunit alpha1 F [KO:K04853]                       |
| 8913    | <i>CACNA1G</i>  | calcium voltage-gated channel subunit alpha1 G [KO:K04854]                       |
| 8912    | <i>CACNA1H</i>  | calcium voltage-gated channel subunit alpha1 H [KO:K04855]                       |
| 8911    | <i>CACNA1I</i>  | calcium voltage-gated channel subunit alpha1 I [KO:K04856]                       |
| 779     | <i>CACNA1S</i>  | calcium voltage-gated channel subunit alpha1 S [KO:K04857]                       |
| 781     | <i>CACNA2D1</i> | calcium voltage-gated channel auxiliary subunit alpha2delta 1 [KO:K04858]        |
| 9254    | <i>CACNA2D2</i> | calcium voltage-gated channel auxiliary subunit alpha2delta 2 [KO:K04859]        |
| 55799   | <i>CACNA2D3</i> | calcium voltage-gated channel auxiliary subunit alpha2delta 3 [KO:K04860]        |
| 93589   | <i>CACNA2D4</i> | calcium voltage-gated channel auxiliary subunit alpha2delta 4 [KO:K04861]        |
| 782     | <i>CACNB1</i>   | calcium voltage-gated channel auxiliary subunit beta 1 [KO:K04862]               |
| 783     | <i>CACNB2</i>   | calcium voltage-gated channel auxiliary subunit beta 2 [KO:K04863]               |
| 784     | <i>CACNB3</i>   | calcium voltage-gated channel auxiliary subunit beta 3 [KO:K04864]               |
| 785     | <i>CACNB4</i>   | calcium voltage-gated channel auxiliary subunit beta 4 [KO:K04865]               |
| 786     | <i>CACNG1</i>   | calcium voltage-gated channel auxiliary subunit gamma 1 [KO:K04866]              |
| 10369   | <i>CACNG2</i>   | calcium voltage-gated channel auxiliary subunit gamma 2 [KO:K04867]              |
| 10368   | <i>CACNG3</i>   | calcium voltage-gated channel auxiliary subunit gamma 3 [KO:K04868]              |
| 27092   | <i>CACNG4</i>   | calcium voltage-gated channel auxiliary subunit gamma 4 [KO:K04869]              |
| 27091   | <i>CACNG5</i>   | calcium voltage-gated channel auxiliary subunit gamma 5 [KO:K04870]              |
| 59285   | <i>CACNG6</i>   | calcium voltage-gated channel auxiliary subunit gamma 6 [KO:K04871]              |
| 59284   | <i>CACNG7</i>   | calcium voltage-gated channel auxiliary subunit gamma 7 [KO:K04872]              |
| 59283   | <i>CACNG8</i>   | calcium voltage-gated channel auxiliary subunit gamma 8 [KO:K04873]              |
| 5566    | <i>PRKACA</i>   | protein kinase cAMP-activated catalytic subunit alpha [KO:K04345] [EC:2.7.11.11] |
| 5567    | <i>PRKACB</i>   | protein kinase cAMP-activated catalytic subunit beta [KO:K04345] [EC:2.7.11.11]  |
| 5568    | <i>PRKACG</i>   | protein kinase cAMP-activated catalytic subunit gamma [KO:K04345] [EC:2.7.11.11] |
| 5578    | <i>PRKCA</i>    | protein kinase C alpha [KO:K02677] [EC:2.7.11.13]                                |
| 5579    | <i>PRKCB</i>    | protein kinase C beta [KO:K19662] [EC:2.7.11.13]                                 |
| 5582    | <i>PRKCG</i>    | protein kinase C gamma [KO:K19663] [EC:2.7.11.13]                                |
| 2768    | <i>GNA12</i>    | G protein subunit alpha 12 [KO:K04346]                                           |
| 55970   | <i>GNG12</i>    | G protein subunit gamma 12 [KO:K04347]                                           |
| 5530    | <i>PPP3CA</i>   | protein phosphatase 3 catalytic subunit alpha [KO:K04348] [EC:3.1.3.16]          |
| 5532    | <i>PPP3CB</i>   | protein phosphatase 3 catalytic subunit beta [KO:K04348] [EC:3.1.3.16]           |
| 5533    | <i>PPP3CC</i>   | protein phosphatase 3 catalytic subunit gamma [KO:K04348] [EC:3.1.3.16]          |
| 5534    | <i>PPP3R1</i>   | protein phosphatase 3 regulatory subunit B, alpha [KO:K06268]                    |
| 5535    | <i>PPP3R2</i>   | protein phosphatase 3 regulatory subunit B, beta [KO:K06268]                     |
| 5923    | <i>RASGRF1</i>  | Ras protein specific guanine nucleotide releasing factor 1 [KO:K04349]           |
| 5924    | <i>RASGRF2</i>  | Ras protein specific guanine nucleotide releasing factor 2 [KO:K12326]           |
| 10125   | <i>RASGRP1</i>  | RAS guanyl releasing protein 1 [KO:K04350]                                       |
| 10235   | <i>RASGRP2</i>  | RAS guanyl releasing protein 2 [KO:K12361]                                       |
| 25780   | <i>RASGRP3</i>  | RAS guanyl releasing protein 3 [KO:K12362]                                       |
| 115727  | <i>RASGRP4</i>  | RAS guanyl releasing protein 4 [KO:K12363]                                       |
| 9693    | <i>RAPGEF2</i>  | Rap guanine nucleotide exchange factor 2 [KO:K08018]                             |
| 4763    | <i>NF1</i>      | neurofibromin 1 [KO:K08052]                                                      |
| 5921    | <i>RASA1</i>    | RAS p21 protein activator 1 [KO:K04352]                                          |
| 5922    | <i>RASA2</i>    | RAS p21 protein activator 2 [KO:K08053]                                          |
| 5906    | <i>RAP1A</i>    | RAP1A, member of RAS oncogene family [KO:K04353]                                 |
| 5908    | <i>RAP1B</i>    | RAP1B, member of RAS oncogene family [KO:K07836]                                 |

|       |                |                                                                         |
|-------|----------------|-------------------------------------------------------------------------|
| 4803  | <i>NGF</i>     | nerve growth factor [KO:K02582]                                         |
| 627   | <i>BDNF</i>    | brain derived neurotrophic factor [KO:K04355]                           |
| 4908  | <i>NTF3</i>    | neurotrophin 3 [KO:K04356]                                              |
| 4909  | <i>NTF4</i>    | neurotrophin 4 [KO:K12457]                                              |
| 1950  | <i>EGF</i>     | epidermal growth factor [KO:K04357]                                     |
| 2246  | <i>FGF1</i>    | fibroblast growth factor 1 [KO:K18496]                                  |
| 2247  | <i>FGF2</i>    | fibroblast growth factor 2 [KO:K18497]                                  |
| 2248  | <i>FGF3</i>    | fibroblast growth factor 3 [KO:K04358]                                  |
| 2249  | <i>FGF4</i>    | fibroblast growth factor 4 [KO:K04358]                                  |
| 8822  | <i>FGF17</i>   | fibroblast growth factor 17 [KO:K04358]                                 |
| 2251  | <i>FGF6</i>    | fibroblast growth factor 6 [KO:K04358]                                  |
| 2252  | <i>FGF7</i>    | fibroblast growth factor 7 [KO:K04358]                                  |
| 2253  | <i>FGF8</i>    | fibroblast growth factor 8 [KO:K04358]                                  |
| 2254  | <i>FGF9</i>    | fibroblast growth factor 9 [KO:K04358]                                  |
| 2255  | <i>FGF10</i>   | fibroblast growth factor 10 [KO:K04358]                                 |
| 2256  | <i>FGF11</i>   | fibroblast growth factor 11 [KO:K04358]                                 |
| 2257  | <i>FGF12</i>   | fibroblast growth factor 12 [KO:K04358]                                 |
| 2258  | <i>FGF13</i>   | fibroblast growth factor 13 [KO:K04358]                                 |
| 2259  | <i>FGF14</i>   | fibroblast growth factor 14 [KO:K04358]                                 |
| 8823  | <i>FGF16</i>   | fibroblast growth factor 16 [KO:K04358]                                 |
| 2250  | <i>FGF5</i>    | fibroblast growth factor 5 [KO:K04358]                                  |
| 8817  | <i>FGF18</i>   | fibroblast growth factor 18 [KO:K04358]                                 |
| 9965  | <i>FGF19</i>   | fibroblast growth factor 19 [KO:K04358]                                 |
| 26281 | <i>FGF20</i>   | fibroblast growth factor 20 [KO:K04358]                                 |
| 26291 | <i>FGF21</i>   | fibroblast growth factor 21 [KO:K04358]                                 |
| 27006 | <i>FGF22</i>   | fibroblast growth factor 22 [KO:K04358]                                 |
| 8074  | <i>FGF23</i>   | fibroblast growth factor 23 [KO:K04358]                                 |
| 5154  | <i>PDGFA</i>   | platelet derived growth factor subunit A [KO:K04359]                    |
| 5155  | <i>PDGFB</i>   | platelet derived growth factor subunit B [KO:K17386]                    |
| 4914  | <i>NTRK1</i>   | neurotrophic receptor tyrosine kinase 1 [KO:K03176] [EC:2.7.10.1]       |
| 4915  | <i>NTRK2</i>   | neurotrophic receptor tyrosine kinase 2 [KO:K04360] [EC:2.7.10.1]       |
| 1956  | <i>EGFR</i>    | epidermal growth factor receptor [KO:K04361] [EC:2.7.10.1]              |
| 2260  | <i>FGFR1</i>   | fibroblast growth factor receptor 1 [KO:K04362] [EC:2.7.10.1]           |
| 2263  | <i>FGFR2</i>   | fibroblast growth factor receptor 2 [KO:K05093] [EC:2.7.10.1]           |
| 2261  | <i>FGFR3</i>   | fibroblast growth factor receptor 3 [KO:K05094] [EC:2.7.10.1]           |
| 2264  | <i>FGFR4</i>   | fibroblast growth factor receptor 4 [KO:K05095] [EC:2.7.10.1]           |
| 5156  | <i>PDGFRA</i>  | platelet derived growth factor receptor alpha [KO:K04363] [EC:2.7.10.1] |
| 5159  | <i>PDGFRB</i>  | platelet derived growth factor receptor beta [KO:K05089] [EC:2.7.10.1]  |
| 2885  | <i>GRB2</i>    | growth factor receptor bound protein 2 [KO:K04364]                      |
| 6654  | <i>SOS1</i>    | SOS Ras/Rac guanine nucleotide exchange factor 1 [KO:K03099]            |
| 6655  | <i>SOS2</i>    | SOS Ras/Rho guanine nucleotide exchange factor 2 [KO:K03099]            |
| 3265  | <i>HRAS</i>    | HRas proto-oncogene, GTPase [KO:K02833]                                 |
| 3845  | <i>KRAS</i>    | KRAS proto-oncogene, GTPase [KO:K07827]                                 |
| 4893  | <i>NRAS</i>    | NRAS proto-oncogene, GTPase [KO:K07828]                                 |
| 6237  | <i>RRAS</i>    | related RAS viral (r-ras) oncogene homolog [KO:K07829]                  |
| 22800 | <i>RRAS2</i>   | related RAS viral (r-ras) oncogene homolog 2 [KO:K07830]                |
| 22808 | <i>MRAS</i>    | muscle RAS oncogene homolog [KO:K07831]                                 |
| 673   | <i>BRAF</i>    | B-Raf proto-oncogene, serine/threonine kinase [KO:K04365] [EC:2.7.11.1] |
| 5894  | <i>RAF1</i>    | Raf-1 proto-oncogene, serine/threonine kinase [KO:K04366] [EC:2.7.11.1] |
| 4342  | <i>MOS</i>     | MOS proto-oncogene, serine/threonine kinase [KO:K04367] [EC:2.7.11.1]   |
| 5604  | <i>MAP2K1</i>  | mitogen-activated protein kinase kinase 1 [KO:K04368] [EC:2.7.12.2]     |
| 5605  | <i>MAP2K2</i>  | mitogen-activated protein kinase kinase 2 [KO:K04369] [EC:2.7.12.2]     |
| 8649  | <i>LAMTOR3</i> | late endosomal/lysosomal adaptor, MAPK and MTOR activator 3 [KO:K04370] |

|           |                      |                                                                                                     |
|-----------|----------------------|-----------------------------------------------------------------------------------------------------|
| 5594      | <i>MAPK1</i>         | mitogen-activated protein kinase 1 [KO:K04371] [EC:2.7.11.24]                                       |
| 5595      | <i>MAPK3</i>         | mitogen-activated protein kinase 3 [KO:K04371] [EC:2.7.11.24]                                       |
| 8569      | <i>MKNK1</i>         | MAP kinase interacting serine/threonine kinase 1 [KO:K04372] [EC:2.7.11.1]                          |
| 2872      | <i>MKNK2</i>         | MAP kinase interacting serine/threonine kinase 2 [KO:K04372] [EC:2.7.11.1]                          |
| 6197      | <i>RPS6KA3</i>       | ribosomal protein S6 kinase A3 [KO:K04373] [EC:2.7.11.1]                                            |
| 6195      | <i>RPS6KA1</i>       | ribosomal protein S6 kinase A1 [KO:K04373] [EC:2.7.11.1]                                            |
| 6196      | <i>RPS6KA2</i>       | ribosomal protein S6 kinase A2 [KO:K04373] [EC:2.7.11.1]                                            |
| 27330     | <i>RPS6KA6</i>       | ribosomal protein S6 kinase A6 [KO:K04373] [EC:2.7.11.1]                                            |
| 468       | <i>ATF4</i>          | activating transcription factor 4 [KO:K04374]                                                       |
| 2002      | <i>ELK1</i>          | ELK1, ETS transcription factor [KO:K04375]                                                          |
| 2005      | <i>ELK4</i>          | ELK4, ETS transcription factor [KO:K04376]                                                          |
| 4609      | <i>MYC</i>           | MYC proto-oncogene, bHLH transcription factor [KO:K04377]                                           |
| 6722      | <i>SRF</i>           | serum response factor [KO:K04378]                                                                   |
| 2353      | <i>FOS</i>           | Fos proto-oncogene, AP-1 transcription factor subunit [KO:K04379]                                   |
| 4137      | <i>MAPT</i>          | microtubule associated protein tau [KO:K04380]                                                      |
| 3925      | <i>STMN1</i>         | stathmin 1 [KO:K04381]                                                                              |
| 123745    | <i>PLA2G4E</i>       | phospholipase A2 group IVE [KO:K16342] [EC:3.1.1.4]                                                 |
| 5321      | <i>PLA2G4A</i>       | phospholipase A2 group IVA [KO:K16342] [EC:3.1.1.4]                                                 |
| 8681      | <i>JMJD7-PLA2G4B</i> | JMJD7-PLA2G4B readthrough [KO:K16342] [EC:3.1.1.4]                                                  |
| 100137049 | <i>PLA2G4B</i>       | phospholipase A2 group IVB [KO:K16342] [EC:3.1.1.4]                                                 |
| 8605      | <i>PLA2G4C</i>       | phospholipase A2 group IVC [KO:K16342] [EC:3.1.1.4]                                                 |
| 283748    | <i>PLA2G4D</i>       | phospholipase A2 group IVD [KO:K16342] [EC:3.1.1.4]                                                 |
| 255189    | <i>PLA2G4F</i>       | phospholipase A2 group IVF [KO:K16342] [EC:3.1.1.4]                                                 |
| 7124      | <i>TNF</i>           | tumor necrosis factor [KO:K03156]                                                                   |
| 3552      | <i>IL1A</i>          | interleukin 1 alpha [KO:K04383]                                                                     |
| 3553      | <i>IL1B</i>          | interleukin 1 beta [KO:K04519]                                                                      |
| 7040      | <i>TGFB1</i>         | transforming growth factor beta 1 [KO:K13375]                                                       |
| 7042      | <i>TGFB2</i>         | transforming growth factor beta 2 [KO:K13376]                                                       |
| 7043      | <i>TGFB3</i>         | transforming growth factor beta 3 [KO:K13377]                                                       |
| 7132      | <i>TNFRSF1A</i>      | TNF receptor superfamily member 1A [KO:K03158]                                                      |
| 3554      | <i>IL1R1</i>         | interleukin 1 receptor type 1 [KO:K04386]                                                           |
| 7850      | <i>IL1R2</i>         | interleukin 1 receptor type 2 [KO:K04387]                                                           |
| 7046      | <i>TGFBR1</i>        | transforming growth factor beta receptor 1 [KO:K04674] [EC:2.7.11.30]                               |
| 7048      | <i>TGFBR2</i>        | transforming growth factor beta receptor 2 [KO:K04388] [EC:2.7.11.30]                               |
| 356       | <i>FASLG</i>         | Fas ligand [KO:K04389]                                                                              |
| 355       | <i>FAS</i>           | Fas cell surface death receptor [KO:K04390]                                                         |
| 929       | <i>CD14</i>          | CD14 molecule [KO:K04391]                                                                           |
| 5879      | <i>RAC1</i>          | ras-related C3 botulinum toxin substrate 1 (rho family, small GTP binding protein Rac1) [KO:K04392] |
| 5880      | <i>RAC2</i>          | ras-related C3 botulinum toxin substrate 2 (rho family, small GTP binding protein Rac2) [KO:K07860] |
| 5881      | <i>RAC3</i>          | ras-related C3 botulinum toxin substrate 3 (rho family, small GTP binding protein Rac3) [KO:K07861] |
| 998       | <i>CDC42</i>         | cell division cycle 42 [KO:K04393]                                                                  |
| 836       | <i>CASP3</i>         | caspase 3 [KO:K02187] [EC:3.4.22.56]                                                                |
| 7186      | <i>TRAF2</i>         | TNF receptor associated factor 2 [KO:K03173] [EC:2.3.2.27]                                          |
| 1616      | <i>DAXX</i>          | death domain associated protein [KO:K02308]                                                         |
| 7189      | <i>TRAF6</i>         | TNF receptor associated factor 6 [KO:K03175] [EC:2.3.2.27]                                          |
| 1647      | <i>GADD45A</i>       | growth arrest and DNA damage inducible alpha [KO:K04402]                                            |
| 4616      | <i>GADD45B</i>       | growth arrest and DNA damage inducible beta [KO:K04402]                                             |
| 10912     | <i>GADD45G</i>       | growth arrest and DNA damage inducible gamma [KO:K04402]                                            |
| 10454     | <i>TAB1</i>          | TGF-beta activated kinase 1 (MAP3K7) binding protein 1 [KO:K04403]                                  |
| 23118     | <i>TAB2</i>          | TGF-beta activated kinase 1/MAP3K7 binding protein 2 [KO:K04404]                                    |

|       |                 |                                                                                       |
|-------|-----------------|---------------------------------------------------------------------------------------|
| 51295 | <i>ECSIT</i>    | ECSIT signalling integrator [KO:K04405]                                               |
| 8491  | <i>MAP4K3</i>   | mitogen-activated protein kinase kinase kinase kinase 3 [KO:K04406] [EC:2.7.11.1]     |
| 9448  | <i>MAP4K4</i>   | mitogen-activated protein kinase kinase kinase kinase 4 [KO:K04407] [EC:2.7.11.1]     |
| 11184 | <i>MAP4K1</i>   | mitogen-activated protein kinase kinase kinase kinase 1 [KO:K04408] [EC:2.7.11.1]     |
| 5058  | <i>PAK1</i>     | p21 (RAC1) activated kinase 1 [KO:K04409] [EC:2.7.11.1]                               |
| 5062  | <i>PAK2</i>     | p21 (RAC1) activated kinase 2 [KO:K04410] [EC:2.7.11.1]                               |
| 6789  | <i>STK4</i>     | serine/threonine kinase 4 [KO:K04411]                                                 |
| 6788  | <i>STK3</i>     | serine/threonine kinase 3 [KO:K04412]                                                 |
| 5871  | <i>MAP4K2</i>   | mitogen-activated protein kinase kinase kinase kinase 2 [KO:K04414] [EC:2.7.11.1]     |
| 1326  | <i>MAP3K8</i>   | mitogen-activated protein kinase kinase kinase 8 [KO:K04415] [EC:2.7.11.25]           |
| 4214  | <i>MAP3K1</i>   | mitogen-activated protein kinase kinase kinase 1 [KO:K04416] [EC:2.7.11.25]           |
| 4296  | <i>MAP3K11</i>  | mitogen-activated protein kinase kinase kinase 11 [KO:K04419] [EC:2.7.11.25]          |
| 10746 | <i>MAP3K2</i>   | mitogen-activated protein kinase kinase kinase 2 [KO:K04420] [EC:2.7.11.25]           |
| 4215  | <i>MAP3K3</i>   | mitogen-activated protein kinase kinase kinase 3 [KO:K04421] [EC:2.7.11.25]           |
| 9175  | <i>MAP3K13</i>  | mitogen-activated protein kinase kinase kinase 13 [KO:K04422] [EC:2.7.11.25]          |
| 7786  | <i>MAP3K12</i>  | mitogen-activated protein kinase kinase kinase 12 [KO:K04423] [EC:2.7.11.25]          |
| 51776 | <i>MAP3K20</i>  | mitogen-activated protein kinase kinase kinase 20 [KO:K04424] [EC:2.7.11.25]          |
| 9064  | <i>MAP3K6</i>   | mitogen-activated protein kinase kinase kinase 6 [KO:K04425] [EC:2.7.11.25]           |
| 4217  | <i>MAP3K5</i>   | mitogen-activated protein kinase kinase kinase 5 [KO:K04426] [EC:2.7.11.25]           |
| 6885  | <i>MAP3K7</i>   | mitogen-activated protein kinase kinase kinase 7 [KO:K04427] [EC:2.7.11.25]           |
| 4216  | <i>MAP3K4</i>   | mitogen-activated protein kinase kinase kinase 4 [KO:K04428] [EC:2.7.11.25]           |
| 9344  | <i>TAOK2</i>    | TAO kinase 2 [KO:K04429] [EC:2.7.11.1]                                                |
| 51347 | <i>TAOK3</i>    | TAO kinase 3 [KO:K04429] [EC:2.7.11.1]                                                |
| 57551 | <i>TAOK1</i>    | TAO kinase 1 [KO:K04429] [EC:2.7.11.1]                                                |
| 6416  | <i>MAP2K4</i>   | mitogen-activated protein kinase kinase 4 [KO:K04430] [EC:2.7.12.2]                   |
| 5609  | <i>MAP2K7</i>   | mitogen-activated protein kinase kinase 7 [KO:K04431] [EC:2.7.12.2]                   |
| 5606  | <i>MAP2K3</i>   | mitogen-activated protein kinase kinase 3 [KO:K04432] [EC:2.7.12.2]                   |
| 5608  | <i>MAP2K6</i>   | mitogen-activated protein kinase kinase 6 [KO:K04433] [EC:2.7.12.2]                   |
| 9479  | <i>MAPK8IP1</i> | mitogen-activated protein kinase 8 interacting protein 1 [KO:K04434]                  |
| 23542 | <i>MAPK8IP2</i> | mitogen-activated protein kinase 8 interacting protein 2 [KO:K04435]                  |
| 23162 | <i>MAPK8IP3</i> | mitogen-activated protein kinase 8 interacting protein 3 [KO:K04436]                  |
| 2316  | <i>FLNA</i>     | filamin A [KO:K04437]                                                                 |
| 2318  | <i>FLNC</i>     | filamin C [KO:K04437]                                                                 |
| 2317  | <i>FLNB</i>     | filamin B [KO:K04437]                                                                 |
| 1398  | <i>CRK</i>      | CRK proto-oncogene, adaptor protein [KO:K04438]                                       |
| 1399  | <i>CRKL</i>     | CRK like proto-oncogene, adaptor protein [KO:K04438]                                  |
| 408   | <i>ARRB1</i>    | arrestin beta 1 [KO:K04439]                                                           |
| 409   | <i>ARRB2</i>    | arrestin beta 2 [KO:K04439]                                                           |
| 5599  | <i>MAPK8</i>    | mitogen-activated protein kinase 8 [KO:K04440] [EC:2.7.11.24]                         |
| 5602  | <i>MAPK10</i>   | mitogen-activated protein kinase 10 [KO:K04440] [EC:2.7.11.24]                        |
| 5601  | <i>MAPK9</i>    | mitogen-activated protein kinase 9 [KO:K04440] [EC:2.7.11.24]                         |
| 5600  | <i>MAPK11</i>   | mitogen-activated protein kinase 11 [KO:K04441] [EC:2.7.11.24]                        |
| 6300  | <i>MAPK12</i>   | mitogen-activated protein kinase 12 [KO:K04441] [EC:2.7.11.24]                        |
| 5603  | <i>MAPK13</i>   | mitogen-activated protein kinase 13 [KO:K04441] [EC:2.7.11.24]                        |
| 1432  | <i>MAPK14</i>   | mitogen-activated protein kinase 14 [KO:K04441] [EC:2.7.11.24]                        |
| 8550  | <i>MAPKAPK5</i> | mitogen-activated protein kinase-activated protein kinase 5 [KO:K04442] [EC:2.7.11.1] |
| 9261  | <i>MAPKAPK2</i> | mitogen-activated protein kinase-activated protein kinase 2 [KO:K04443] [EC:2.7.11.1] |
| 7867  | <i>MAPKAPK3</i> | mitogen-activated protein kinase-activated protein kinase 3 [KO:K04444] [EC:2.7.11.1] |
| 9252  | <i>RPS6KA5</i>  | ribosomal protein S6 kinase A5 [KO:K04445] [EC:2.7.11.1]                              |
| 8986  | <i>RPS6KA4</i>  | ribosomal protein S6 kinase A4 [KO:K16510] [EC:2.7.11.1]                              |
| 994   | <i>CDC25B</i>   | cell division cycle 25B [KO:K05866] [EC:3.1.3.48]                                     |
| 4772  | <i>NFATC1</i>   | nuclear factor of activated T-cells 1 [KO:K04446]                                     |
| 4775  | <i>NFATC3</i>   | nuclear factor of activated T-cells 3 [KO:K17333]                                     |

|           |                |                                                                                                |
|-----------|----------------|------------------------------------------------------------------------------------------------|
| 3725      | <i>JUN</i>     | Jun proto-oncogene, AP-1 transcription factor subunit [KO:K04448]                              |
| 3727      | <i>JUND</i>    | JunD proto-oncogene, AP-1 transcription factor subunit [KO:K04449]                             |
| 1386      | <i>ATF2</i>    | activating transcription factor 2 [KO:K04450]                                                  |
| 7157      | <i>TP53</i>    | tumor protein p53 [KO:K04451]                                                                  |
| 1649      | <i>DDIT3</i>   | DNA damage inducible transcript 3 [KO:K04452]                                                  |
| 4149      | <i>MAX</i>     | MYC associated factor X [KO:K04453]                                                            |
| 4208      | <i>MEF2C</i>   | myocyte enhancer factor 2C [KO:K04454]                                                         |
| 3315      | <i>HSPB1</i>   | heat shock protein family B (small) member 1 [KO:K04455]                                       |
| 207       | <i>AKT1</i>    | AKT serine/threonine kinase 1 [KO:K04456] [EC:2.7.11.1]                                        |
| 208       | <i>AKT2</i>    | AKT serine/threonine kinase 2 [KO:K04456] [EC:2.7.11.1]                                        |
| 10000     | <i>AKT3</i>    | AKT serine/threonine kinase 3 [KO:K04456] [EC:2.7.11.1]                                        |
| 5494      | <i>PPM1A</i>   | protein phosphatase, Mg <sup>2+</sup> /Mn <sup>2+</sup> dependent 1A [KO:K04457] [EC:3.1.3.16] |
| 5801      | <i>PTPRR</i>   | protein tyrosine phosphatase, receptor type R [KO:K04458] [EC:3.1.3.48]                        |
| 84867     | <i>PTPN5</i>   | protein tyrosine phosphatase, non-receptor type 5 [KO:K18018] [EC:3.1.3.48]                    |
| 5778      | <i>PTPN7</i>   | protein tyrosine phosphatase, non-receptor type 7 [KO:K18019] [EC:3.1.3.48]                    |
| 1843      | <i>DUSP1</i>   | dual specificity phosphatase 1 [KO:K21278] [EC:3.1.3.48 3.1.3.16]                              |
| 1846      | <i>DUSP4</i>   | dual specificity phosphatase 4 [KO:K04459] [EC:3.1.3.48 3.1.3.16]                              |
| 1844      | <i>DUSP2</i>   | dual specificity phosphatase 2 [KO:K04459] [EC:3.1.3.48 3.1.3.16]                              |
| 1849      | <i>DUSP7</i>   | dual specificity phosphatase 7 [KO:K04459] [EC:3.1.3.48 3.1.3.16]                              |
| 1850      | <i>DUSP8</i>   | dual specificity phosphatase 8 [KO:K04459] [EC:3.1.3.48 3.1.3.16]                              |
| 1847      | <i>DUSP5</i>   | dual specificity phosphatase 5 [KO:K04459] [EC:3.1.3.48 3.1.3.16]                              |
| 80824     | <i>DUSP16</i>  | dual specificity phosphatase 16 [KO:K04459] [EC:3.1.3.48 3.1.3.16]                             |
| 1848      | <i>DUSP6</i>   | dual specificity phosphatase 6 [KO:K21946] [EC:3.1.3.48 3.1.3.16]                              |
| 1852      | <i>DUSP9</i>   | dual specificity phosphatase 9 [KO:K18498] [EC:3.1.3.48 3.1.3.16]                              |
| 11221     | <i>DUSP10</i>  | dual specificity phosphatase 10 [KO:K20216] [EC:3.1.3.48 3.1.3.16]                             |
| 1845      | <i>DUSP3</i>   | dual specificity phosphatase 3 [KO:K17614] [EC:3.1.3.48 3.1.3.16]                              |
| 5536      | <i>PPP5C</i>   | protein phosphatase 5 catalytic subunit [KO:K04460] [EC:3.1.3.16]                              |
| 100506012 | <i>PPP5D1</i>  | PPP5 tetratricopeptide repeat domain containing 1 [KO:K04460] [EC:3.1.3.16]                    |
| 5495      | <i>PPM1B</i>   | protein phosphatase, Mg <sup>2+</sup> /Mn <sup>2+</sup> dependent 1B [KO:K04461] [EC:3.1.3.16] |
| 3312      | <i>HSPA8</i>   | heat shock protein family A (Hsp70) member 8 [KO:K03283]                                       |
| 3303      | <i>HSPA1A</i>  | heat shock protein family A (Hsp70) member 1A [KO:K03283]                                      |
| 3306      | <i>HSPA2</i>   | heat shock protein family A (Hsp70) member 2 [KO:K03283]                                       |
| 3305      | <i>HSPA1L</i>  | heat shock protein family A (Hsp70) member 1 like [KO:K03283]                                  |
| 3304      | <i>HSPA1B</i>  | heat shock protein family A (Hsp70) member 1B [KO:K03283]                                      |
| 3310      | <i>HSPA6</i>   | heat shock protein family A (Hsp70) member 6 [KO:K03283]                                       |
| 2122      | <i>MECOM</i>   | MDS1 and EVI1 complex locus [KO:K04462]                                                        |
| 5607      | <i>MAP2K5</i>  | mitogen-activated protein kinase kinase 5 [KO:K04463] [EC:2.7.12.2]                            |
| 5598      | <i>MAPK7</i>   | mitogen-activated protein kinase 7 [KO:K04464] [EC:2.7.11.24]                                  |
| 3164      | <i>NR4A1</i>   | nuclear receptor subfamily 4 group A member 1 [KO:K04465]                                      |
| 9020      | <i>MAP3K14</i> | mitogen-activated protein kinase kinase kinase 14 [KO:K04466] [EC:2.7.11.25]                   |
| 1147      | <i>CHUK</i>    | conserved helix-loop-helix ubiquitous kinase [KO:K04467] [EC:2.7.11.10]                        |
| 3551      | <i>IKBKB</i>   | inhibitor of nuclear factor kappa B kinase subunit beta [KO:K07209] [EC:2.7.11.10]             |
| 8517      | <i>IKBKG</i>   | inhibitor of nuclear factor kappa B kinase subunit gamma [KO:K07210]                           |
| 51701     | <i>NLK</i>     | nemo like kinase [KO:K04468] [EC:2.7.11.24]                                                    |
| 4790      | <i>NFKB1</i>   | nuclear factor kappa B subunit 1 [KO:K02580]                                                   |
| 4791      | <i>NFKB2</i>   | nuclear factor kappa B subunit 2 [KO:K04469]                                                   |
| 5970      | <i>RELA</i>    | RELA proto-oncogene, NF-kB subunit [KO:K04735]                                                 |
| 5971      | <i>RELB</i>    | RELB proto-oncogene, NF-kB subunit [KO:K09253]                                                 |

Supplemental Table S2. Differentially expression of genes in MAPK-Signaling Pathway and CRC

| Gene Name       | Tumor Mean | Normal Mean | Fold Change | P-Value  | Adjusted P-Value |
|-----------------|------------|-------------|-------------|----------|------------------|
| <i>FGF9</i>     | 1.66       | 9.08        | 0.18        | 4.27E-30 | 6.44E-29         |
| <i>PPP3R2</i>   | 0.20       | 0.93        | 0.21        | 3.56E-07 | 8.02E-07         |
| <i>CACNG3</i>   | 0.16       | 0.62        | 0.25        | 4.46E-04 | 7.32E-04         |
| <i>CACNG7</i>   | 0.17       | 0.67        | 0.25        | 1.91E-05 | 3.48E-05         |
| <i>CACNA1A</i>  | 3.27       | 12.58       | 0.26        | 2.27E-32 | 4.57E-31         |
| <i>CACNA1G</i>  | 1.26       | 4.80        | 0.26        | 4.08E-16 | 1.79E-15         |
| <i>CACNA1F</i>  | 1.68       | 6.25        | 0.27        | 1.60E-21 | 1.01E-20         |
| <i>RASGRP2</i>  | 6.72       | 24.73       | 0.27        | 1.04E-31 | 1.93E-30         |
| <i>PRKCB</i>    | 14.65      | 53.12       | 0.28        | 1.52E-41 | 7.31E-40         |
| <i>CACNA1I</i>  | 1.91       | 6.56        | 0.29        | 8.80E-19 | 4.51E-18         |
| <i>MAPK10</i>   | 9.26       | 28.10       | 0.33        | 8.93E-34 | 1.96E-32         |
| <i>MAP4K1</i>   | 7.24       | 21.46       | 0.34        | 1.58E-26 | 1.74E-25         |
| <i>CACNG2</i>   | 0.21       | 0.57        | 0.37        | 2.28E-03 | 3.41E-03         |
| <i>PRKACB</i>   | 62.60      | 162.73      | 0.38        | 5.72E-40 | 1.97E-38         |
| <i>FGFR2</i>    | 26.51      | 68.82       | 0.39        | 2.32E-21 | 1.40E-20         |
| <i>MEF2C</i>    | 27.15      | 66.82       | 0.41        | 1.00E-41 | 6.02E-40         |
| <i>FOS</i>      | 185.52     | 453.52      | 0.41        | 9.65E-31 | 1.66E-29         |
| <i>CACNG1</i>   | 0.27       | 0.65        | 0.42        | 3.35E-05 | 5.89E-05         |
| <i>FGF10</i>    | 1.70       | 4.06        | 0.42        | 1.85E-10 | 5.45E-10         |
| <i>PTPN5</i>    | 0.89       | 2.09        | 0.42        | 7.08E-07 | 1.55E-06         |
| <i>DUSP1</i>    | 67.66      | 154.53      | 0.44        | 1.02E-34 | 2.46E-33         |
| <i>EGF</i>      | 2.83       | 6.34        | 0.45        | 1.71E-05 | 3.15E-05         |
| <i>CACNB2</i>   | 26.71      | 59.55       | 0.45        | 1.00E-38 | 3.03E-37         |
| <i>IL1R2</i>    | 7.02       | 15.61       | 0.45        | 1.00E-13 | 3.77E-13         |
| <i>NTRK1</i>    | 1.10       | 2.43        | 0.45        | 3.24E-07 | 7.36E-07         |
| <i>CACNA1B</i>  | 1.79       | 3.91        | 0.46        | 1.99E-06 | 4.14E-06         |
| <i>NTRK2</i>    | 17.81      | 38.41       | 0.46        | 1.04E-08 | 2.67E-08         |
| <i>DUSP5</i>    | 28.27      | 59.40       | 0.48        | 1.39E-22 | 9.28E-22         |
| <i>CACNA1H</i>  | 53.11      | 106.08      | 0.50        | 5.22E-27 | 5.99E-26         |
| <i>FGFR3</i>    | 36.15      | 70.78       | 0.51        | 1.13E-18 | 5.54E-18         |
| <i>MAPT</i>     | 4.51       | 8.74        | 0.52        | 1.01E-12 | 3.40E-12         |
| <i>NFATC1</i>   | 12.01      | 22.97       | 0.52        | 3.23E-17 | 1.50E-16         |
| <i>PDGFRA</i>   | 88.47      | 166.61      | 0.53        | 5.08E-26 | 5.11E-25         |
| <i>CACNA2D3</i> | 1.56       | 2.91        | 0.53        | 1.46E-04 | 2.46E-04         |
| <i>MAPK7</i>    | 21.28      | 38.75       | 0.55        | 6.78E-29 | 9.08E-28         |
| <i>FAS</i>      | 28.16      | 50.95       | 0.55        | 2.75E-24 | 2.46E-23         |
| <i>CACNA1S</i>  | 0.56       | 1.00        | 0.56        | 6.90E-03 | 1.00E-02         |
| <i>RASGRP1</i>  | 21.77      | 38.90       | 0.56        | 1.20E-22 | 8.23E-22         |
| <i>PRKACG</i>   | 0.17       | 0.31        | 0.56        | 1.84E-03 | 2.79E-03         |
| <i>RASGRP3</i>  | 25.53      | 45.22       | 0.56        | 1.16E-20 | 6.81E-20         |
| <i>FGF2</i>     | 10.04      | 17.66       | 0.57        | 2.79E-13 | 9.89E-13         |
| <i>FGF13</i>    | 2.42       | 4.18        | 0.58        | 2.84E-05 | 5.06E-05         |
| <i>RAC2</i>     | 22.11      | 37.39       | 0.59        | 4.70E-16 | 2.02E-15         |
| <i>FGF7</i>     | 8.17       | 13.70       | 0.60        | 1.49E-08 | 3.69E-08         |
| <i>NTF3</i>     | 0.84       | 1.41        | 0.60        | 1.04E-03 | 1.61E-03         |
| <i>RPS6KA1</i>  | 89.25      | 148.07      | 0.60        | 1.24E-30 | 2.00E-29         |
| <i>JUND</i>     | 127.78     | 210.71      | 0.61        | 1.88E-36 | 5.04E-35         |
| <i>PLA2G4F</i>  | 22.98      | 37.48       | 0.61        | 2.67E-10 | 7.76E-10         |
| <i>CACNA2D2</i> | 10.30      | 16.63       | 0.62        | 1.02E-08 | 2.63E-08         |
| <i>RPS6KA5</i>  | 18.57      | 29.87       | 0.62        | 1.84E-15 | 7.76E-15         |

|                 |        |        |      |          |          |
|-----------------|--------|--------|------|----------|----------|
| <i>FLNC</i>     | 46.98  | 75.44  | 0.62 | 3.90E-09 | 1.02E-08 |
| <i>ARRB1</i>    | 52.99  | 84.74  | 0.63 | 4.44E-24 | 3.61E-23 |
| <i>NR4A1</i>    | 201.17 | 319.66 | 0.63 | 5.51E-11 | 1.72E-10 |
| <i>FASLG</i>    | 1.07   | 1.70   | 0.63 | 4.96E-03 | 7.29E-03 |
| <i>IL1R1</i>    | 57.71  | 89.40  | 0.65 | 9.55E-17 | 4.34E-16 |
| <i>HSPA2</i>    | 7.29   | 11.21  | 0.65 | 5.51E-06 | 1.08E-05 |
| <i>PTPN7</i>    | 16.22  | 24.78  | 0.65 | 3.08E-08 | 7.57E-08 |
| <i>MAP3K14</i>  | 33.86  | 51.73  | 0.65 | 1.46E-24 | 1.35E-23 |
| <i>MAP2K6</i>   | 25.29  | 38.55  | 0.66 | 1.60E-10 | 4.77E-10 |
| <i>MKNK1</i>    | 63.58  | 95.95  | 0.66 | 2.04E-27 | 2.46E-26 |
| <i>CACNA2D4</i> | 8.65   | 12.94  | 0.67 | 1.05E-07 | 2.52E-07 |
| <i>BDNF</i>     | 4.72   | 7.03   | 0.67 | 3.29E-06 | 6.60E-06 |
| <i>MAPK3</i>    | 62.34  | 92.73  | 0.67 | 9.12E-19 | 4.58E-18 |
| <i>CACNB4</i>   | 5.58   | 8.29   | 0.67 | 9.67E-05 | 1.64E-04 |
| <i>RASGRP4</i>  | 5.22   | 7.74   | 0.67 | 9.38E-07 | 1.98E-06 |
| <i>CD14</i>     | 9.64   | 14.13  | 0.68 | 1.36E-07 | 3.15E-07 |
| <i>FGFR1</i>    | 54.37  | 77.12  | 0.70 | 6.72E-11 | 2.05E-10 |
| <i>RPS6KA6</i>  | 10.53  | 14.89  | 0.71 | 9.47E-04 | 1.48E-03 |
| <i>RAP1B</i>    | 72.62  | 101.88 | 0.71 | 1.01E-23 | 7.59E-23 |
| <i>SOS2</i>     | 91.40  | 127.77 | 0.72 | 2.38E-20 | 1.33E-19 |
| <i>PDGFA</i>    | 40.23  | 56.15  | 0.72 | 3.25E-11 | 1.03E-10 |
| <i>PLA2G4E</i>  | 1.22   | 1.68   | 0.72 | 3.37E-02 | 4.51E-02 |
| <i>MAP3K6</i>   | 21.20  | 29.17  | 0.73 | 9.95E-08 | 2.40E-07 |
| <i>FGF12</i>    | 1.01   | 1.32   | 0.76 | 1.36E-01 | 1.70E-01 |
| <i>RAP1A</i>    | 56.39  | 73.96  | 0.76 | 1.12E-13 | 4.16E-13 |
| <i>TNFRSF1A</i> | 90.65  | 118.74 | 0.76 | 4.32E-20 | 2.37E-19 |
| <i>MAP3K11</i>  | 100.41 | 131.31 | 0.76 | 3.80E-16 | 1.69E-15 |
| <i>MECOM</i>    | 154.07 | 196.91 | 0.78 | 1.58E-09 | 4.28E-09 |
| <i>MKNK2</i>    | 184.21 | 235.23 | 0.78 | 8.60E-14 | 3.29E-13 |
| <i>CACNA2D1</i> | 12.45  | 15.82  | 0.79 | 1.52E-03 | 2.31E-03 |
| <i>AKT3</i>     | 41.45  | 52.56  | 0.79 | 2.51E-05 | 4.51E-05 |
| <i>MAP2K5</i>   | 29.19  | 36.52  | 0.80 | 4.08E-07 | 9.10E-07 |
| <i>RPS6KA2</i>  | 43.83  | 54.74  | 0.80 | 3.04E-06 | 6.15E-06 |
| <i>PPM1A</i>    | 116.19 | 144.84 | 0.80 | 2.47E-13 | 8.90E-13 |
| <i>DUSP8</i>    | 41.88  | 52.20  | 0.80 | 7.25E-07 | 1.57E-06 |
| <i>EGFR</i>     | 175.46 | 217.61 | 0.81 | 2.03E-13 | 7.42E-13 |
| <i>PLA2G4C</i>  | 5.61   | 6.94   | 0.81 | 2.51E-02 | 3.42E-02 |
| <i>PPP3CC</i>   | 17.08  | 20.97  | 0.81 | 4.27E-04 | 7.07E-04 |
| <i>FLNB</i>     | 782.75 | 954.16 | 0.82 | 3.36E-10 | 9.63E-10 |
| <i>MAP3K12</i>  | 48.60  | 59.03  | 0.82 | 1.14E-08 | 2.86E-08 |
| <i>FGF23</i>    | 0.45   | 0.55   | 0.82 | 4.40E-01 | 4.91E-01 |
| <i>PRKCA</i>    | 69.40  | 83.99  | 0.83 | 8.91E-08 | 2.17E-07 |
| <i>MAP3K13</i>  | 84.75  | 101.91 | 0.83 | 2.01E-09 | 5.37E-09 |
| <i>MAP3K3</i>   | 40.17  | 48.21  | 0.83 | 2.64E-06 | 5.40E-06 |
| <i>PPM1B</i>    | 79.30  | 94.30  | 0.84 | 1.06E-08 | 2.69E-08 |
| <i>TAOK3</i>    | 108.78 | 127.43 | 0.85 | 1.32E-07 | 3.10E-07 |
| <i>CRK</i>      | 96.42  | 112.18 | 0.86 | 1.08E-07 | 2.56E-07 |
| <i>RELB</i>     | 24.80  | 28.79  | 0.86 | 1.24E-03 | 1.91E-03 |
| <i>TAOK2</i>    | 80.96  | 93.16  | 0.87 | 7.45E-07 | 1.60E-06 |
| <i>RRAS2</i>    | 22.54  | 25.84  | 0.87 | 1.72E-02 | 2.38E-02 |
| <i>GADD45G</i>  | 2.79   | 3.18   | 0.88 | 2.07E-01 | 2.50E-01 |
| <i>TAB2</i>     | 128.75 | 146.44 | 0.88 | 8.45E-07 | 1.80E-06 |
| <i>CACNB1</i>   | 14.72  | 16.72  | 0.88 | 4.31E-02 | 5.64E-02 |

|                      |        |        |      |          |          |
|----------------------|--------|--------|------|----------|----------|
| <i>PRKACA</i>        | 53.45  | 60.68  | 0.88 | 3.93E-06 | 7.77E-06 |
| <i>TAB1</i>          | 29.01  | 32.68  | 0.89 | 1.36E-03 | 2.09E-03 |
| <i>RASGRF1</i>       | 2.50   | 2.81   | 0.89 | 4.14E-01 | 4.64E-01 |
| <i>RAF1</i>          | 131.53 | 147.29 | 0.89 | 5.78E-07 | 1.28E-06 |
| <i>MAPK8IP3</i>      | 129.73 | 144.99 | 0.89 | 2.01E-04 | 3.36E-04 |
| <i>GNG12</i>         | 144.35 | 161.26 | 0.90 | 1.93E-03 | 2.91E-03 |
| <i>CACNA1E</i>       | 6.12   | 6.79   | 0.90 | 3.93E-01 | 4.49E-01 |
| <i>PLA2G4B</i>       | 38.29  | 42.23  | 0.91 | 1.99E-02 | 2.72E-02 |
| <i>MAX</i>           | 70.54  | 77.59  | 0.91 | 2.51E-03 | 3.73E-03 |
| <i>MAP3K1</i>        | 73.96  | 81.10  | 0.91 | 3.54E-03 | 5.23E-03 |
| <i>KRAS</i>          | 107.64 | 117.88 | 0.91 | 1.65E-02 | 2.30E-02 |
| <i>MAP2K4</i>        | 32.10  | 35.00  | 0.92 | 7.33E-02 | 9.30E-02 |
| <i>NFKB2</i>         | 45.18  | 49.11  | 0.92 | 5.89E-02 | 7.59E-02 |
| <i>HSPA1L</i>        | 2.74   | 2.97   | 0.92 | 3.64E-01 | 4.18E-01 |
| <i>MAP2K2</i>        | 69.97  | 75.76  | 0.92 | 1.47E-02 | 2.08E-02 |
| <i>NFKB1</i>         | 77.63  | 83.98  | 0.92 | 7.65E-03 | 1.10E-02 |
| <i>MAP3K5</i>        | 68.22  | 73.59  | 0.93 | 3.82E-02 | 5.04E-02 |
| <i>JMJD7-PLA2G4B</i> | 66.55  | 71.72  | 0.93 | 3.74E-02 | 4.96E-02 |
| <i>IKBKB</i>         | 137.36 | 145.80 | 0.94 | 6.63E-02 | 8.45E-02 |
| <i>TNF</i>           | 1.95   | 2.04   | 0.96 | 7.52E-01 | 7.88E-01 |
| <i>PPP3CB</i>        | 55.64  | 58.21  | 0.96 | 2.28E-01 | 2.74E-01 |
| <i>CASP3</i>         | 42.94  | 44.90  | 0.96 | 3.39E-01 | 3.96E-01 |
| <i>PTPRR</i>         | 11.77  | 12.30  | 0.96 | 7.01E-01 | 7.46E-01 |
| <i>MAP2K7</i>        | 49.83  | 52.02  | 0.96 | 1.68E-01 | 2.06E-01 |
| <i>FGF11</i>         | 3.97   | 4.12   | 0.96 | 7.29E-01 | 7.68E-01 |
| <i>PLA2G4A</i>       | 6.99   | 7.23   | 0.97 | 8.04E-01 | 8.32E-01 |
| <i>SOS1</i>          | 159.37 | 164.61 | 0.97 | 2.24E-01 | 2.70E-01 |
| <i>RASA1</i>         | 127.03 | 130.76 | 0.97 | 2.90E-01 | 3.46E-01 |
| <i>ECSIT</i>         | 18.73  | 19.16  | 0.98 | 6.83E-01 | 7.31E-01 |
| <i>FGF17</i>         | 0.93   | 0.94   | 0.99 | 9.30E-01 | 9.30E-01 |
| <i>MAP2K3</i>        | 71.67  | 72.13  | 0.99 | 8.80E-01 | 8.94E-01 |
| <i>MAPKAPK2</i>      | 124.26 | 125.03 | 0.99 | 8.12E-01 | 8.35E-01 |
| <i>BRAF</i>          | 55.05  | 55.31  | 1.00 | 8.86E-01 | 8.94E-01 |
| <i>MAP3K2</i>        | 197.26 | 196.59 | 1.00 | 8.85E-01 | 8.94E-01 |
| <i>CACNB3</i>        | 31.74  | 31.59  | 1.00 | 9.27E-01 | 9.30E-01 |
| <i>NFATC3</i>        | 159.90 | 158.77 | 1.01 | 7.71E-01 | 8.05E-01 |
| <i>AKT1</i>          | 153.83 | 152.34 | 1.01 | 7.08E-01 | 7.48E-01 |
| <i>LAMTOR3</i>       | 30.88  | 30.52  | 1.01 | 8.00E-01 | 8.31E-01 |
| <i>CDC42</i>         | 145.07 | 143.06 | 1.01 | 6.08E-01 | 6.60E-01 |
| <i>NLK</i>           | 48.11  | 47.34  | 1.02 | 6.50E-01 | 6.99E-01 |
| <i>JUN</i>           | 214.48 | 211.03 | 1.02 | 7.02E-01 | 7.46E-01 |
| <i>MAPK8</i>         | 62.01  | 60.98  | 1.02 | 6.19E-01 | 6.69E-01 |
| <i>RASA2</i>         | 81.22  | 79.82  | 1.02 | 5.99E-01 | 6.57E-01 |
| <i>MAPK11</i>        | 6.71   | 6.59   | 1.02 | 8.23E-01 | 8.40E-01 |
| <i>PPP3CA</i>        | 81.01  | 79.40  | 1.02 | 6.04E-01 | 6.59E-01 |
| <i>MAPK1</i>         | 183.50 | 179.79 | 1.02 | 3.53E-01 | 4.09E-01 |
| <i>GRB2</i>          | 114.66 | 112.16 | 1.02 | 4.07E-01 | 4.61E-01 |
| <i>MAPK9</i>         | 65.92  | 64.12  | 1.03 | 4.12E-01 | 4.64E-01 |
| <i>DUSP6</i>         | 81.99  | 79.35  | 1.03 | 4.78E-01 | 5.31E-01 |
| <i>TRAF6</i>         | 38.06  | 36.78  | 1.03 | 3.37E-01 | 3.96E-01 |
| <i>MAPK12</i>        | 46.73  | 44.85  | 1.04 | 3.25E-01 | 3.84E-01 |
| <i>PLA2G4D</i>       | 1.06   | 1.01   | 1.05 | 8.14E-01 | 8.35E-01 |
| <i>TGFB1</i>         | 41.60  | 39.64  | 1.05 | 3.65E-01 | 4.18E-01 |

|          |         |         |      |          |          |
|----------|---------|---------|------|----------|----------|
| FLNA     | 1070.76 | 1020.00 | 1.05 | 2.93E-01 | 3.48E-01 |
| PPP5C    | 61.00   | 57.30   | 1.06 | 4.95E-02 | 6.45E-02 |
| MAPK13   | 64.53   | 60.31   | 1.07 | 6.44E-02 | 8.25E-02 |
| GADD45B  | 12.90   | 12.05   | 1.07 | 3.43E-01 | 4.00E-01 |
| ARRB2    | 39.77   | 37.09   | 1.07 | 1.43E-01 | 1.78E-01 |
| MAPK8IP1 | 7.51    | 6.98    | 1.08 | 4.07E-01 | 4.61E-01 |
| MAP3K4   | 69.84   | 64.78   | 1.08 | 1.61E-02 | 2.25E-02 |
| MAP3K8   | 22.11   | 20.49   | 1.08 | 1.84E-01 | 2.25E-01 |
| ATF2     | 69.51   | 64.16   | 1.08 | 1.05E-02 | 1.49E-02 |
| RAPGEF2  | 156.93  | 143.11  | 1.10 | 6.68E-04 | 1.06E-03 |
| TGFBR2   | 197.09  | 178.93  | 1.10 | 5.25E-03 | 7.67E-03 |
| FGF5     | 1.02    | 0.92    | 1.11 | 5.99E-01 | 6.57E-01 |
| MAPK14   | 141.75  | 127.24  | 1.11 | 8.85E-05 | 1.51E-04 |
| IKBKG    | 6.91    | 6.20    | 1.11 | 2.04E-01 | 2.49E-01 |
| DUSP3    | 93.00   | 83.37   | 1.12 | 6.89E-04 | 1.09E-03 |
| RELA     | 82.20   | 73.32   | 1.12 | 5.56E-06 | 1.08E-05 |
| SRF      | 68.66   | 61.18   | 1.12 | 4.64E-04 | 7.46E-04 |
| ELK4     | 257.18  | 228.38  | 1.13 | 1.63E-05 | 3.02E-05 |
| RPS6KA3  | 249.75  | 221.67  | 1.13 | 5.35E-04 | 8.54E-04 |
| PAK1     | 115.45  | 102.10  | 1.13 | 4.79E-05 | 8.31E-05 |
| HSPA1A   | 29.65   | 26.18   | 1.13 | 1.23E-01 | 1.55E-01 |
| MAP4K2   | 18.67   | 16.46   | 1.13 | 5.29E-02 | 6.85E-02 |
| GADD45A  | 13.07   | 11.37   | 1.15 | 3.07E-02 | 4.13E-02 |
| AKT2     | 156.81  | 135.87  | 1.15 | 2.66E-07 | 6.11E-07 |
| DUSP2    | 8.36    | 7.24    | 1.15 | 1.11E-01 | 1.39E-01 |
| FGF14    | 0.56    | 0.48    | 1.15 | 5.48E-01 | 6.06E-01 |
| RRAS     | 19.63   | 16.97   | 1.16 | 7.41E-03 | 1.07E-02 |
| MAP2K1   | 32.75   | 28.06   | 1.17 | 4.28E-04 | 7.07E-04 |
| MAP3K7   | 72.49   | 62.09   | 1.17 | 9.69E-07 | 2.03E-06 |
| TGFB3    | 16.83   | 14.40   | 1.17 | 3.72E-02 | 4.95E-02 |
| CHUK     | 44.48   | 37.81   | 1.18 | 4.50E-04 | 7.32E-04 |
| DUSP16   | 108.13  | 91.66   | 1.18 | 5.91E-06 | 1.14E-05 |
| MAPK8IP2 | 2.34    | 1.95    | 1.20 | 1.54E-01 | 1.91E-01 |
| IL1B     | 22.58   | 18.76   | 1.20 | 2.65E-02 | 3.58E-02 |
| CACNA1C  | 70.88   | 58.66   | 1.21 | 4.64E-04 | 7.46E-04 |
| ATF4     | 130.84  | 105.67  | 1.24 | 8.92E-13 | 3.03E-12 |
| CRKL     | 130.15  | 103.92  | 1.25 | 3.08E-15 | 1.28E-14 |
| DAXX     | 35.66   | 28.09   | 1.27 | 3.63E-10 | 1.03E-09 |
| MAPKAPK5 | 60.52   | 47.19   | 1.28 | 1.05E-10 | 3.15E-10 |
| CACNA1D  | 91.77   | 71.00   | 1.29 | 2.49E-06 | 5.13E-06 |
| NF1      | 372.04  | 287.40  | 1.29 | 8.42E-25 | 8.12E-24 |
| TAOK1    | 158.33  | 121.96  | 1.30 | 1.88E-20 | 1.08E-19 |
| STK4     | 198.94  | 152.89  | 1.30 | 2.64E-12 | 8.70E-12 |
| RPS6KA4  | 45.93   | 35.30   | 1.30 | 6.56E-11 | 2.03E-10 |
| PDGFB    | 17.40   | 13.37   | 1.30 | 7.15E-05 | 1.23E-04 |
| RASGRF2  | 31.70   | 24.17   | 1.31 | 8.81E-06 | 1.67E-05 |
| DDIT3    | 11.07   | 8.29    | 1.34 | 3.01E-05 | 5.33E-05 |
| RAC3     | 2.78    | 2.05    | 1.36 | 9.11E-03 | 1.30E-02 |
| NRAS     | 104.64  | 76.74   | 1.36 | 3.26E-15 | 1.33E-14 |
| TRAF2    | 40.20   | 29.46   | 1.36 | 8.02E-13 | 2.76E-12 |
| FGFR4    | 68.96   | 50.37   | 1.37 | 2.80E-09 | 7.42E-09 |
| DUSP7    | 23.89   | 17.23   | 1.39 | 5.23E-10 | 1.47E-09 |
| MRAS     | 14.39   | 10.28   | 1.40 | 6.98E-06 | 1.34E-05 |

|                 |        |        |      |          |          |
|-----------------|--------|--------|------|----------|----------|
| <i>PAK2</i>     | 186.93 | 132.40 | 1.41 | 6.02E-30 | 8.54E-29 |
| <i>RAC1</i>     | 180.81 | 127.60 | 1.42 | 3.51E-26 | 3.67E-25 |
| <i>MAPKAPK3</i> | 44.98  | 31.68  | 1.42 | 5.84E-14 | 2.31E-13 |
| <i>MAP4K3</i>   | 75.09  | 52.16  | 1.44 | 2.98E-17 | 1.41E-16 |
| <i>PPP3R1</i>   | 89.41  | 61.65  | 1.45 | 1.55E-23 | 1.13E-22 |
| <i>GNA12</i>    | 72.97  | 50.22  | 1.45 | 2.04E-21 | 1.26E-20 |
| <i>MAP4K4</i>   | 133.74 | 91.25  | 1.47 | 3.76E-23 | 2.66E-22 |
| <i>PRKCG</i>    | 3.38   | 2.29   | 1.48 | 1.74E-02 | 2.40E-02 |
| <i>HRAS</i>     | 18.52  | 12.37  | 1.50 | 3.52E-12 | 1.15E-11 |
| <i>HSPB1</i>    | 60.24  | 40.01  | 1.51 | 3.87E-12 | 1.24E-11 |
| <i>TGFBR1</i>   | 106.44 | 70.13  | 1.52 | 6.14E-19 | 3.21E-18 |
| <i>STK3</i>     | 41.26  | 26.65  | 1.55 | 1.64E-18 | 7.88E-18 |
| <i>HSPA6</i>    | 5.49   | 3.43   | 1.60 | 3.67E-05 | 6.40E-05 |
| <i>ELK1</i>     | 49.96  | 30.79  | 1.62 | 4.90E-24 | 3.81E-23 |
| <i>DUSP10</i>   | 27.04  | 16.22  | 1.67 | 3.95E-14 | 1.59E-13 |
| <i>FGF1</i>     | 4.77   | 2.79   | 1.71 | 9.30E-06 | 1.75E-05 |
| <i>TP53</i>     | 105.07 | 59.63  | 1.76 | 3.25E-24 | 2.79E-23 |
| <i>HSPA1B</i>   | 102.12 | 55.34  | 1.85 | 4.49E-24 | 3.61E-23 |
| <i>PDGFRB</i>   | 166.24 | 87.76  | 1.89 | 8.03E-28 | 1.02E-26 |
| <i>TGFB2</i>    | 9.23   | 4.52   | 2.04 | 8.04E-14 | 3.13E-13 |
| <i>FGF18</i>    | 1.90   | 0.85   | 2.22 | 1.27E-05 | 2.36E-05 |
| <i>HSPA8</i>    | 631.28 | 273.40 | 2.31 | 5.34E-56 | 1.29E-53 |
| <i>CACNG8</i>   | 7.57   | 3.27   | 2.32 | 7.89E-10 | 2.19E-09 |
| <i>STMN1</i>    | 77.81  | 31.07  | 2.50 | 1.15E-40 | 4.63E-39 |
| <i>DUSP4</i>    | 56.69  | 21.44  | 2.64 | 2.53E-22 | 1.65E-21 |
| <i>CDC25B</i>   | 169.88 | 60.96  | 2.79 | 9.71E-54 | 7.80E-52 |
| <i>IL1A</i>     | 7.56   | 2.39   | 3.17 | 2.02E-19 | 1.08E-18 |
| <i>NTF4</i>     | 0.55   | 0.17   | 3.23 | 3.80E-06 | 7.57E-06 |
| <i>CACNG4</i>   | 3.41   | 1.03   | 3.30 | 8.11E-10 | 2.22E-09 |
| <i>MYC</i>      | 181.11 | 49.00  | 3.70 | 5.76E-55 | 6.94E-53 |
| <i>FGF20</i>    | 0.72   | 0.14   | 5.29 | 2.29E-05 | 4.15E-05 |
| <i>FGF19</i>    | 1.39   | 0.15   | 9.42 | 6.08E-13 | 2.12E-12 |

Supplemental Table S3. Differentially Expressed genes in MAPK-Signaling Pathway in MSS-specific CRC tumors

| Gene Name       | Tumor Mean | Normal Mean | Fold Change | P-Value  | Adjusted P-Value |
|-----------------|------------|-------------|-------------|----------|------------------|
| <i>FGF9</i>     | 1.54       | 8.90        | 0.17        | 1.97E-28 | 3.17E-27         |
| <i>PPP3R2</i>   | 0.21       | 0.93        | 0.23        | 4.56E-06 | 9.08E-06         |
| <i>CACNG3</i>   | 0.14       | 0.59        | 0.23        | 5.85E-04 | 9.43E-04         |
| <i>CACNA1A</i>  | 3.12       | 13.04       | 0.24        | 1.78E-31 | 3.90E-30         |
| <i>CACNA1F</i>  | 1.61       | 6.05        | 0.27        | 3.75E-19 | 2.26E-18         |
| <i>CACNG7</i>   | 0.14       | 0.53        | 0.27        | 9.99E-05 | 1.73E-04         |
| <i>CACNA1I</i>  | 1.78       | 6.53        | 0.27        | 3.54E-18 | 1.90E-17         |
| <i>PRKCB</i>    | 13.53      | 49.63       | 0.27        | 3.87E-37 | 1.87E-35         |
| <i>RASGRP2</i>  | 6.50       | 23.81       | 0.27        | 3.67E-28 | 5.52E-27         |
| <i>CACNA1G</i>  | 1.32       | 4.52        | 0.29        | 1.15E-12 | 4.34E-12         |
| <i>MAPK10</i>   | 9.11       | 27.60       | 0.33        | 1.54E-31 | 3.70E-30         |
| <i>MAP4K1</i>   | 7.00       | 20.62       | 0.34        | 8.27E-23 | 6.64E-22         |
| <i>CACNG2</i>   | 0.21       | 0.60        | 0.36        | 4.12E-03 | 6.05E-03         |
| <i>FGFR2</i>    | 23.56      | 63.63       | 0.37        | 1.11E-20 | 7.62E-20         |
| <i>IL1R2</i>    | 6.10       | 15.74       | 0.39        | 1.10E-16 | 5.41E-16         |
| <i>NTRK1</i>    | 0.95       | 2.40        | 0.39        | 2.24E-08 | 5.63E-08         |
| <i>PRKACB</i>   | 63.18      | 158.66      | 0.40        | 1.47E-38 | 8.88E-37         |
| <i>FOS</i>      | 185.07     | 459.66      | 0.40        | 2.51E-27 | 3.36E-26         |
| <i>MEF2C</i>    | 26.21      | 63.01       | 0.42        | 2.02E-36 | 8.12E-35         |
| <i>CACNA1B</i>  | 1.68       | 3.97        | 0.42        | 2.63E-06 | 5.36E-06         |
| <i>DUSP1</i>    | 67.85      | 158.64      | 0.43        | 4.90E-31 | 9.83E-30         |
| <i>PTPN5</i>    | 0.96       | 2.17        | 0.44        | 3.19E-06 | 6.41E-06         |
| <i>CACNB2</i>   | 26.70      | 60.56       | 0.44        | 9.67E-35 | 2.91E-33         |
| <i>CACNG1</i>   | 0.29       | 0.65        | 0.45        | 3.18E-04 | 5.35E-04         |
| <i>FGF10</i>    | 1.75       | 3.85        | 0.45        | 8.70E-08 | 2.12E-07         |
| <i>NTRK2</i>    | 18.31      | 38.56       | 0.47        | 1.84E-07 | 4.30E-07         |
| <i>DUSP5</i>    | 28.22      | 58.81       | 0.48        | 2.43E-19 | 1.50E-18         |
| <i>NFATC1</i>   | 10.80      | 22.32       | 0.48        | 6.38E-19 | 3.58E-18         |
| <i>CACNA1H</i>  | 55.23      | 110.48      | 0.50        | 4.12E-24 | 4.52E-23         |
| <i>EGF</i>      | 3.21       | 6.36        | 0.50        | 9.71E-04 | 1.50E-03         |
| <i>MAPT</i>     | 4.55       | 8.91        | 0.51        | 1.45E-11 | 5.10E-11         |
| <i>FGFR3</i>    | 37.26      | 72.10       | 0.52        | 1.35E-16 | 6.49E-16         |
| <i>MAPK7</i>    | 20.82      | 39.85       | 0.52        | 1.36E-27 | 1.92E-26         |
| <i>FAS</i>      | 25.99      | 49.72       | 0.52        | 3.54E-23 | 3.16E-22         |
| <i>RASGRP1</i>  | 19.70      | 37.52       | 0.53        | 7.47E-22 | 5.46E-21         |
| <i>FASLG</i>    | 0.91       | 1.69        | 0.54        | 3.27E-04 | 5.47E-04         |
| <i>CACNA2D3</i> | 1.56       | 2.86        | 0.54        | 6.14E-04 | 9.68E-04         |
| <i>PDGFRA</i>   | 90.72      | 165.26      | 0.55        | 4.37E-22 | 3.29E-21         |
| <i>RASGRP3</i>  | 24.55      | 44.61       | 0.55        | 4.51E-19 | 2.59E-18         |
| <i>NTF3</i>     | 0.76       | 1.37        | 0.55        | 3.90E-04 | 6.47E-04         |
| <i>FGF2</i>     | 9.95       | 17.73       | 0.56        | 1.46E-11 | 5.10E-11         |
| <i>RAC2</i>     | 20.46      | 36.16       | 0.57        | 6.93E-16 | 3.09E-15         |
| <i>FGF7</i>     | 7.94       | 13.85       | 0.57        | 1.23E-08 | 3.20E-08         |
| <i>RPS6KA1</i>  | 87.10      | 151.23      | 0.58        | 6.69E-31 | 1.24E-29         |
| <i>FLNC</i>     | 47.73      | 80.92       | 0.59        | 2.52E-09 | 7.23E-09         |
| <i>FGF13</i>    | 2.46       | 4.15        | 0.59        | 1.46E-04 | 2.52E-04         |
| <i>CACNA1S</i>  | 0.60       | 1.00        | 0.59        | 2.39E-02 | 3.26E-02         |
| <i>RPS6KA5</i>  | 18.00      | 29.77       | 0.60        | 2.32E-14 | 9.65E-14         |
| <i>PRKACG</i>   | 0.20       | 0.33        | 0.61        | 1.39E-02 | 1.96E-02         |
| <i>JUND</i>     | 129.44     | 213.08      | 0.61        | 5.03E-32 | 1.35E-30         |

|                 |        |        |      |          |          |
|-----------------|--------|--------|------|----------|----------|
| <i>ARRB1</i>    | 52.57  | 86.10  | 0.61 | 4.31E-23 | 3.71E-22 |
| <i>CACNA2D2</i> | 10.31  | 16.68  | 0.62 | 3.49E-08 | 8.67E-08 |
| <i>HSPA2</i>    | 7.42   | 11.54  | 0.64 | 1.37E-05 | 2.63E-05 |
| <i>NR4A1</i>    | 211.96 | 329.74 | 0.64 | 1.16E-08 | 3.03E-08 |
| <i>MAP3K14</i>  | 33.49  | 51.65  | 0.65 | 1.30E-23 | 1.25E-22 |
| <i>PLA2G4F</i>  | 24.66  | 38.02  | 0.65 | 1.47E-08 | 3.76E-08 |
| <i>CACNB4</i>   | 5.02   | 7.73   | 0.65 | 3.59E-05 | 6.46E-05 |
| <i>MKNK1</i>    | 62.71  | 95.68  | 0.66 | 6.93E-24 | 6.96E-23 |
| <i>IL1R1</i>    | 57.04  | 86.97  | 0.66 | 3.76E-14 | 1.54E-13 |
| <i>MAP3K6</i>   | 19.42  | 29.43  | 0.66 | 4.05E-11 | 1.36E-10 |
| <i>MAP2K6</i>   | 25.21  | 38.16  | 0.66 | 3.46E-09 | 9.69E-09 |
| <i>PTPN7</i>    | 15.71  | 23.76  | 0.66 | 5.15E-07 | 1.15E-06 |
| <i>CD14</i>     | 9.45   | 14.25  | 0.66 | 1.12E-07 | 2.68E-07 |
| <i>CACNA2D4</i> | 8.40   | 12.65  | 0.66 | 2.59E-07 | 5.89E-07 |
| <i>MAPK3</i>    | 62.23  | 93.18  | 0.67 | 4.28E-17 | 2.15E-16 |
| <i>BDNF</i>     | 4.78   | 6.93   | 0.69 | 5.46E-05 | 9.68E-05 |
| <i>RASGRP4</i>  | 5.14   | 7.45   | 0.69 | 1.53E-05 | 2.90E-05 |
| <i>RAP1B</i>    | 70.93  | 102.70 | 0.69 | 3.07E-23 | 2.84E-22 |
| <i>FGFR1</i>    | 55.70  | 78.69  | 0.71 | 3.46E-09 | 9.69E-09 |
| <i>SOS2</i>     | 90.85  | 127.09 | 0.71 | 4.17E-19 | 2.45E-18 |
| <i>TNFRSF1A</i> | 87.61  | 118.88 | 0.74 | 7.39E-23 | 6.14E-22 |
| <i>PDGFA</i>    | 42.06  | 56.56  | 0.74 | 1.05E-08 | 2.82E-08 |
| <i>CACNA2D1</i> | 12.07  | 15.94  | 0.76 | 5.87E-04 | 9.43E-04 |
| <i>MAP3K11</i>  | 100.38 | 131.79 | 0.76 | 4.36E-14 | 1.72E-13 |
| <i>RAP1A</i>    | 55.44  | 71.37  | 0.78 | 1.38E-10 | 4.38E-10 |
| <i>RPS6KA6</i>  | 11.45  | 14.73  | 0.78 | 1.58E-02 | 2.22E-02 |
| <i>AKT3</i>     | 40.61  | 52.05  | 0.78 | 5.75E-05 | 1.01E-04 |
| <i>PLA2G4A</i>  | 5.63   | 7.21   | 0.78 | 9.03E-02 | 1.15E-01 |
| <i>MKNK2</i>    | 186.33 | 237.93 | 0.78 | 1.84E-12 | 6.81E-12 |
| <i>FGF12</i>    | 1.02   | 1.29   | 0.79 | 2.35E-01 | 2.82E-01 |
| <i>PLA2G4E</i>  | 1.30   | 1.65   | 0.79 | 1.45E-01 | 1.81E-01 |
| <i>MAP2K5</i>   | 28.83  | 36.31  | 0.79 | 2.42E-06 | 4.99E-06 |
| <i>MECOM</i>    | 154.96 | 194.95 | 0.79 | 1.08E-08 | 2.85E-08 |
| <i>EGFR</i>     | 173.25 | 217.89 | 0.80 | 1.44E-13 | 5.49E-13 |
| <i>PPM1A</i>    | 112.53 | 141.41 | 0.80 | 4.18E-12 | 1.53E-11 |
| <i>RPS6KA2</i>  | 43.27  | 54.32  | 0.80 | 1.15E-05 | 2.28E-05 |
| <i>DUSP8</i>    | 43.21  | 53.67  | 0.81 | 3.08E-06 | 6.25E-06 |
| <i>MAP3K12</i>  | 48.15  | 59.73  | 0.81 | 7.03E-09 | 1.93E-08 |
| <i>PPP3CC</i>   | 16.60  | 20.57  | 0.81 | 6.02E-04 | 9.61E-04 |
| <i>FLNB</i>     | 770.33 | 951.62 | 0.81 | 2.49E-10 | 7.49E-10 |
| <i>CRK</i>      | 91.47  | 110.78 | 0.83 | 9.81E-10 | 2.88E-09 |
| <i>PRKCA</i>    | 69.76  | 84.27  | 0.83 | 1.07E-07 | 2.57E-07 |
| <i>PPM1B</i>    | 77.88  | 94.08  | 0.83 | 7.78E-09 | 2.11E-08 |
| <i>MAP3K13</i>  | 83.26  | 99.51  | 0.84 | 1.33E-07 | 3.15E-07 |
| <i>MAP3K3</i>   | 40.27  | 47.72  | 0.84 | 6.03E-05 | 1.05E-04 |
| <i>PLA2G4C</i>  | 5.97   | 7.03   | 0.85 | 1.03E-01 | 1.29E-01 |
| <i>TAOK3</i>    | 106.39 | 125.16 | 0.85 | 5.38E-07 | 1.19E-06 |
| <i>TAOK2</i>    | 80.60  | 93.88  | 0.86 | 9.60E-07 | 2.05E-06 |
| <i>RELB</i>     | 24.69  | 28.67  | 0.86 | 3.26E-03 | 4.88E-03 |
| <i>TAB1</i>     | 28.72  | 33.07  | 0.87 | 6.07E-04 | 9.62E-04 |
| <i>MAP2K4</i>   | 30.62  | 35.14  | 0.87 | 1.02E-02 | 1.44E-02 |
| <i>RRAS2</i>    | 21.51  | 24.67  | 0.87 | 2.75E-02 | 3.72E-02 |
| <i>CACNB1</i>   | 14.55  | 16.59  | 0.88 | 5.19E-02 | 6.79E-02 |

|                      |         |         |      |          |          |
|----------------------|---------|---------|------|----------|----------|
| <i>RAF1</i>          | 129.93  | 147.72  | 0.88 | 1.88E-07 | 4.36E-07 |
| <i>MAP3K5</i>        | 64.53   | 73.00   | 0.88 | 9.98E-04 | 1.53E-03 |
| <i>PRKACA</i>        | 53.66   | 60.68   | 0.88 | 3.21E-05 | 5.81E-05 |
| <i>TAB2</i>          | 126.20  | 142.60  | 0.89 | 1.54E-05 | 2.90E-05 |
| <i>CACNA1E</i>       | 5.79    | 6.53    | 0.89 | 3.68E-01 | 4.23E-01 |
| <i>KRAS</i>          | 102.76  | 115.27  | 0.89 | 6.55E-03 | 9.39E-03 |
| <i>NFKB1</i>         | 74.35   | 83.07   | 0.90 | 5.04E-04 | 8.26E-04 |
| <i>FGF17</i>         | 0.83    | 0.93    | 0.90 | 4.99E-01 | 5.47E-01 |
| <i>NFKB2</i>         | 43.48   | 48.47   | 0.90 | 2.37E-02 | 3.25E-02 |
| <i>MAX</i>           | 68.38   | 76.20   | 0.90 | 1.56E-03 | 2.37E-03 |
| <i>MAP3K1</i>        | 71.55   | 79.29   | 0.90 | 3.11E-03 | 4.68E-03 |
| <i>FGF11</i>         | 3.57    | 3.93    | 0.91 | 3.87E-01 | 4.38E-01 |
| <i>MAPK8IP3</i>      | 132.45  | 145.48  | 0.91 | 3.79E-03 | 5.60E-03 |
| <i>PLA2G4B</i>       | 39.21   | 42.79   | 0.92 | 5.21E-02 | 6.79E-02 |
| <i>GNG12</i>         | 144.21  | 157.33  | 0.92 | 2.38E-02 | 3.25E-02 |
| <i>GADD45G</i>       | 2.84    | 3.09    | 0.92 | 4.65E-01 | 5.16E-01 |
| <i>CASP3</i>         | 40.44   | 43.73   | 0.92 | 1.24E-01 | 1.55E-01 |
| <i>PTPRR</i>         | 10.94   | 11.79   | 0.93 | 5.51E-01 | 5.99E-01 |
| <i>JMJD7-PLA2G4B</i> | 68.08   | 73.14   | 0.93 | 6.06E-02 | 7.84E-02 |
| <i>MAP2K2</i>        | 71.00   | 76.18   | 0.93 | 4.26E-02 | 5.61E-02 |
| <i>PPP3CB</i>        | 53.74   | 56.85   | 0.95 | 1.86E-01 | 2.26E-01 |
| <i>IKKBK</i>         | 139.63  | 146.41  | 0.95 | 1.80E-01 | 2.21E-01 |
| <i>MAP2K3</i>        | 68.75   | 71.73   | 0.96 | 3.59E-01 | 4.14E-01 |
| <i>RASA1</i>         | 124.54  | 129.40  | 0.96 | 1.95E-01 | 2.35E-01 |
| <i>MAP2K7</i>        | 50.10   | 51.76   | 0.97 | 3.49E-01 | 4.08E-01 |
| <i>TNF</i>           | 1.94    | 2.00    | 0.97 | 8.43E-01 | 8.52E-01 |
| <i>HSPA1L</i>        | 2.91    | 2.99    | 0.97 | 7.65E-01 | 8.02E-01 |
| <i>ECSIT</i>         | 18.77   | 19.27   | 0.97 | 6.66E-01 | 7.07E-01 |
| <i>AKT1</i>          | 149.80  | 153.53  | 0.98 | 3.57E-01 | 4.13E-01 |
| <i>SOS1</i>          | 156.26  | 159.10  | 0.98 | 5.47E-01 | 5.97E-01 |
| <i>PPP3CA</i>        | 76.38   | 77.67   | 0.98 | 6.86E-01 | 7.25E-01 |
| <i>BRAF</i>          | 54.68   | 55.58   | 0.98 | 6.39E-01 | 6.85E-01 |
| <i>PLA2G4D</i>       | 1.06    | 1.08    | 0.99 | 9.58E-01 | 9.62E-01 |
| <i>MAPKAPK2</i>      | 125.02  | 125.70  | 0.99 | 8.45E-01 | 8.52E-01 |
| <i>MAPK11</i>        | 6.45    | 6.44    | 1.00 | 9.87E-01 | 9.87E-01 |
| <i>NFATC3</i>        | 159.07  | 157.77  | 1.01 | 7.57E-01 | 7.96E-01 |
| <i>CDC42</i>         | 141.68  | 140.45  | 1.01 | 7.74E-01 | 8.05E-01 |
| <i>MAPK8</i>         | 60.07   | 59.48   | 1.01 | 7.92E-01 | 8.16E-01 |
| <i>LAMTOR3</i>       | 29.96   | 29.66   | 1.01 | 8.43E-01 | 8.52E-01 |
| <i>MAPK1</i>         | 179.19  | 177.32  | 1.01 | 6.62E-01 | 7.06E-01 |
| <i>DUSP6</i>         | 80.28   | 79.16   | 1.01 | 7.75E-01 | 8.05E-01 |
| <i>TGFB1</i>         | 39.73   | 39.15   | 1.01 | 8.01E-01 | 8.21E-01 |
| <i>RASA2</i>         | 81.11   | 79.45   | 1.02 | 5.70E-01 | 6.16E-01 |
| <i>MAP3K2</i>        | 194.54  | 190.31  | 1.02 | 3.79E-01 | 4.33E-01 |
| <i>CACNB3</i>        | 32.84   | 31.97   | 1.03 | 6.18E-01 | 6.65E-01 |
| <i>NLK</i>           | 48.15   | 46.84   | 1.03 | 4.80E-01 | 5.31E-01 |
| <i>RASGRF1</i>       | 2.69    | 2.61    | 1.03 | 8.39E-01 | 8.52E-01 |
| <i>TRAF6</i>         | 37.66   | 36.47   | 1.03 | 4.13E-01 | 4.65E-01 |
| <i>MAPK9</i>         | 64.79   | 62.72   | 1.03 | 3.81E-01 | 4.33E-01 |
| <i>MAPK12</i>        | 45.66   | 44.16   | 1.03 | 4.61E-01 | 5.15E-01 |
| <i>FLNA</i>          | 1101.68 | 1063.82 | 1.04 | 4.93E-01 | 5.42E-01 |
| <i>GRB2</i>          | 115.12  | 110.69  | 1.04 | 1.71E-01 | 2.12E-01 |
| <i>JUN</i>           | 229.02  | 218.97  | 1.05 | 3.18E-01 | 3.76E-01 |

|          |        |        |      |          |          |
|----------|--------|--------|------|----------|----------|
| MAP3K8   | 21.28  | 20.33  | 1.05 | 4.58E-01 | 5.13E-01 |
| PPP5C    | 60.57  | 57.07  | 1.06 | 9.09E-02 | 1.15E-01 |
| ARRB2    | 39.12  | 36.53  | 1.07 | 1.77E-01 | 2.18E-01 |
| FGF23    | 0.46   | 0.42   | 1.08 | 7.78E-01 | 8.05E-01 |
| MAP3K4   | 69.37  | 64.11  | 1.08 | 1.81E-02 | 2.51E-02 |
| IL1B     | 20.45  | 18.71  | 1.09 | 3.09E-01 | 3.67E-01 |
| ATF2     | 68.23  | 62.24  | 1.10 | 7.04E-03 | 1.00E-02 |
| RAPGEF2  | 158.39 | 143.63 | 1.10 | 7.70E-04 | 1.21E-03 |
| IKBKG    | 7.43   | 6.74   | 1.10 | 2.64E-01 | 3.15E-01 |
| PAK1     | 113.64 | 102.80 | 1.11 | 1.94E-03 | 2.94E-03 |
| MAPK13   | 67.23  | 60.24  | 1.12 | 5.25E-03 | 7.57E-03 |
| RELA     | 83.08  | 74.02  | 1.12 | 1.40E-05 | 2.68E-05 |
| SRF      | 68.94  | 61.02  | 1.13 | 4.17E-04 | 6.89E-04 |
| DUSP3    | 94.46  | 83.40  | 1.13 | 5.38E-04 | 8.77E-04 |
| MAPK14   | 143.24 | 125.84 | 1.14 | 2.41E-05 | 4.43E-05 |
| ELK4     | 252.34 | 221.55 | 1.14 | 1.64E-05 | 3.04E-05 |
| GADD45A  | 12.80  | 11.20  | 1.14 | 6.08E-02 | 7.84E-02 |
| GADD45B  | 13.22  | 11.56  | 1.14 | 7.81E-02 | 1.00E-01 |
| MAPK8IP1 | 7.95   | 6.93   | 1.15 | 1.28E-01 | 1.60E-01 |
| MAP2K1   | 31.83  | 27.72  | 1.15 | 3.42E-03 | 5.09E-03 |
| CHUK     | 42.41  | 36.69  | 1.16 | 4.17E-03 | 6.09E-03 |
| AKT2     | 159.97 | 136.80 | 1.17 | 3.68E-07 | 8.28E-07 |
| RPS6KA3  | 253.94 | 216.56 | 1.17 | 2.56E-05 | 4.68E-05 |
| TGFB3    | 16.85  | 14.25  | 1.18 | 3.99E-02 | 5.28E-02 |
| TGFBR2   | 207.95 | 175.84 | 1.18 | 6.56E-07 | 1.44E-06 |
| MAP3K7   | 72.57  | 61.36  | 1.18 | 1.06E-06 | 2.23E-06 |
| MAPK8IP2 | 2.20   | 1.85   | 1.19 | 1.89E-01 | 2.28E-01 |
| FGF5     | 0.99   | 0.82   | 1.21 | 3.55E-01 | 4.13E-01 |
| MAP4K2   | 18.92  | 15.61  | 1.21 | 4.87E-03 | 7.07E-03 |
| HSPA1A   | 33.27  | 27.28  | 1.22 | 1.72E-02 | 2.40E-02 |
| ATF4     | 128.67 | 104.89 | 1.23 | 3.56E-11 | 1.21E-10 |
| DUSP16   | 113.18 | 91.93  | 1.23 | 4.38E-08 | 1.08E-07 |
| CRKL     | 128.52 | 104.39 | 1.23 | 2.05E-11 | 7.06E-11 |
| RRAS     | 20.43  | 16.58  | 1.23 | 2.38E-04 | 4.07E-04 |
| DUSP2    | 8.49   | 6.87   | 1.24 | 2.80E-02 | 3.75E-02 |
| CACNA1C  | 74.60  | 58.92  | 1.27 | 1.59E-05 | 2.97E-05 |
| MAPKAPK5 | 61.30  | 48.19  | 1.27 | 1.94E-09 | 5.63E-09 |
| FGF14    | 0.61   | 0.48   | 1.28 | 3.39E-01 | 3.99E-01 |
| RPS6KA4  | 45.96  | 35.13  | 1.31 | 8.98E-10 | 2.67E-09 |
| DAXX     | 35.84  | 27.39  | 1.31 | 4.69E-11 | 1.55E-10 |
| DDIT3    | 10.78  | 8.23   | 1.31 | 2.46E-04 | 4.18E-04 |
| RAC3     | 2.65   | 2.02   | 1.31 | 2.77E-02 | 3.73E-02 |
| NF1      | 377.83 | 286.21 | 1.32 | 5.17E-24 | 5.42E-23 |
| TAOK1    | 158.19 | 119.51 | 1.32 | 1.25E-19 | 7.91E-19 |
| PDGFB    | 17.51  | 13.16  | 1.33 | 5.34E-05 | 9.52E-05 |
| CACNA1D  | 94.38  | 70.52  | 1.34 | 6.98E-07 | 1.52E-06 |
| DUSP7    | 23.34  | 17.09  | 1.37 | 1.83E-08 | 4.64E-08 |
| RASGRF2  | 31.53  | 22.92  | 1.38 | 1.10E-06 | 2.32E-06 |
| TRAF2    | 40.71  | 29.42  | 1.38 | 6.02E-12 | 2.17E-11 |
| STK4     | 206.88 | 148.46 | 1.39 | 6.23E-16 | 2.83E-15 |
| FGFR4    | 71.55  | 50.78  | 1.41 | 2.21E-10 | 6.73E-10 |
| NRAS     | 105.16 | 74.25  | 1.42 | 1.73E-15 | 7.59E-15 |
| HRAS     | 17.71  | 12.32  | 1.44 | 7.06E-09 | 1.93E-08 |

|                 |        |        |       |          |          |
|-----------------|--------|--------|-------|----------|----------|
| <i>PAK2</i>     | 186.50 | 129.57 | 1.44  | 3.44E-29 | 5.92E-28 |
| <i>PPP3R1</i>   | 87.18  | 60.51  | 1.44  | 5.70E-18 | 2.99E-17 |
| <i>PRKCG</i>    | 2.86   | 1.97   | 1.45  | 3.54E-02 | 4.72E-02 |
| <i>RAC1</i>     | 185.06 | 126.22 | 1.47  | 2.06E-26 | 2.48E-25 |
| <i>MAP4K3</i>   | 75.22  | 51.22  | 1.47  | 1.99E-16 | 9.42E-16 |
| <i>MRAS</i>     | 14.22  | 9.65   | 1.47  | 1.39E-06 | 2.90E-06 |
| <i>MAPKAPK3</i> | 46.50  | 31.54  | 1.47  | 1.87E-14 | 7.89E-14 |
| <i>GNA12</i>    | 74.01  | 50.07  | 1.48  | 1.07E-19 | 7.17E-19 |
| <i>STK3</i>     | 38.46  | 25.93  | 1.48  | 3.92E-14 | 1.57E-13 |
| <i>HSPA6</i>    | 5.27   | 3.51   | 1.50  | 7.94E-04 | 1.24E-03 |
| <i>MAP4K4</i>   | 133.82 | 88.26  | 1.52  | 1.09E-26 | 1.38E-25 |
| <i>TGFBR1</i>   | 103.38 | 67.72  | 1.53  | 4.94E-16 | 2.29E-15 |
| <i>HSPB1</i>    | 60.73  | 39.72  | 1.53  | 5.13E-11 | 1.67E-10 |
| <i>DUSP10</i>   | 25.70  | 16.54  | 1.55  | 1.38E-10 | 4.38E-10 |
| <i>ELK1</i>     | 50.36  | 30.35  | 1.66  | 3.67E-22 | 2.85E-21 |
| <i>TP53</i>     | 99.81  | 57.76  | 1.73  | 1.16E-19 | 7.58E-19 |
| <i>FGF1</i>     | 4.96   | 2.80   | 1.77  | 1.17E-05 | 2.30E-05 |
| <i>HSPA1B</i>   | 105.40 | 57.15  | 1.84  | 8.46E-21 | 6.00E-20 |
| <i>PDGFRB</i>   | 172.44 | 87.63  | 1.97  | 2.69E-26 | 3.08E-25 |
| <i>TGFB2</i>    | 9.19   | 4.09   | 2.25  | 3.22E-15 | 1.38E-14 |
| <i>HSPA8</i>    | 614.77 | 265.35 | 2.32  | 2.92E-53 | 7.03E-51 |
| <i>DUSP4</i>    | 45.68  | 19.40  | 2.35  | 1.24E-17 | 6.37E-17 |
| <i>CACNG8</i>   | 6.93   | 2.84   | 2.45  | 1.62E-10 | 5.00E-10 |
| <i>STMN1</i>    | 73.26  | 29.40  | 2.49  | 5.98E-36 | 2.06E-34 |
| <i>FGF18</i>    | 2.01   | 0.76   | 2.65  | 2.17E-07 | 4.98E-07 |
| <i>CDC25B</i>   | 169.79 | 59.15  | 2.87  | 3.20E-47 | 2.57E-45 |
| <i>IL1A</i>     | 7.58   | 2.24   | 3.38  | 2.45E-18 | 1.34E-17 |
| <i>CACNG4</i>   | 4.04   | 1.10   | 3.66  | 1.56E-10 | 4.89E-10 |
| <i>NTF4</i>     | 0.62   | 0.16   | 3.79  | 8.54E-07 | 1.84E-06 |
| <i>MYC</i>      | 192.41 | 49.64  | 3.88  | 2.13E-49 | 2.57E-47 |
| <i>FGF20</i>    | 0.78   | 0.13   | 6.03  | 1.22E-05 | 2.37E-05 |
| <i>FGF19</i>    | 1.64   | 0.13   | 12.27 | 1.19E-13 | 4.62E-13 |

Supplemental Table S4. Differentially Expressed Genes in MAPK-Signaling Pathway in MSI-Specific CRC Tumors

| Gene Name       | Tumor Mean | Normal Mean | Fold Change | P-Value  | Adjusted P-Value |
|-----------------|------------|-------------|-------------|----------|------------------|
| <i>CACNA1G</i>  | 0.96       | 7.40        | 0.13        | 1.49E-04 | 1.56E-03         |
| <i>RPS6KA6</i>  | 3.23       | 15.91       | 0.20        | 2.65E-04 | 2.36E-03         |
| <i>PPP3R2</i>   | 0.11       | 0.52        | 0.20        | 2.09E-02 | 5.44E-02         |
| <i>FGF10</i>    | 1.12       | 5.22        | 0.22        | 3.27E-05 | 4.92E-04         |
| <i>EGF</i>      | 1.33       | 5.68        | 0.23        | 6.17E-04 | 4.25E-03         |
| <i>FGF23</i>    | 0.37       | 1.57        | 0.24        | 2.10E-02 | 5.44E-02         |
| <i>CACNG7</i>   | 0.66       | 2.59        | 0.25        | 5.30E-02 | 1.11E-01         |
| <i>CACNG1</i>   | 0.15       | 0.59        | 0.26        | 1.93E-03 | 1.06E-02         |
| <i>FGF9</i>     | 2.79       | 10.17       | 0.27        | 1.06E-03 | 6.41E-03         |
| <i>CACNA1F</i>  | 2.24       | 8.15        | 0.27        | 1.62E-03 | 9.07E-03         |
| <i>RASGRP2</i>  | 8.71       | 31.49       | 0.28        | 5.40E-04 | 3.82E-03         |
| <i>CACNG3</i>   | 0.42       | 1.52        | 0.28        | 1.75E-01 | 2.78E-01         |
| <i>PLA2G4E</i>  | 0.59       | 1.97        | 0.30        | 8.86E-03 | 3.01E-02         |
| <i>PRKACB</i>   | 51.14      | 170.04      | 0.30        | 1.63E-06 | 4.95E-05         |
| <i>MAPK10</i>   | 10.30      | 32.15       | 0.32        | 3.94E-04 | 3.06E-03         |
| <i>PRKCB</i>    | 25.53      | 79.68       | 0.32        | 5.68E-06 | 1.37E-04         |
| <i>PRKACG</i>   | 0.09       | 0.28        | 0.32        | 1.26E-03 | 7.24E-03         |
| <i>PLA2G4F</i>  | 10.75      | 33.03       | 0.33        | 6.88E-04 | 4.60E-03         |
| <i>MAP4K1</i>   | 9.26       | 28.32       | 0.33        | 4.66E-05 | 6.24E-04         |
| <i>PTPN5</i>    | 0.74       | 2.16        | 0.34        | 7.27E-02 | 1.41E-01         |
| <i>MEF2C</i>    | 34.75      | 95.49       | 0.36        | 1.64E-06 | 4.95E-05         |
| <i>RASGRF1</i>  | 1.73       | 4.46        | 0.39        | 8.37E-03 | 2.92E-02         |
| <i>CACNG2</i>   | 0.27       | 0.71        | 0.39        | 2.03E-01 | 3.17E-01         |
| <i>FGF14</i>    | 0.10       | 0.26        | 0.39        | 7.26E-02 | 1.41E-01         |
| <i>FGF18</i>    | 1.04       | 2.57        | 0.41        | 1.47E-01 | 2.42E-01         |
| <i>CACNA1S</i>  | 0.36       | 0.87        | 0.41        | 8.29E-02 | 1.59E-01         |
| <i>PDGFRA</i>   | 72.03      | 170.72      | 0.42        | 2.63E-05 | 4.22E-04         |
| <i>NTRK2</i>    | 15.87      | 37.03       | 0.43        | 3.64E-02 | 8.21E-02         |
| <i>DUSP5</i>    | 29.37      | 66.01       | 0.44        | 1.62E-04 | 1.63E-03         |
| <i>FGFR3</i>    | 28.18      | 62.99       | 0.45        | 7.30E-04 | 4.63E-03         |
| <i>CACNA1I</i>  | 3.33       | 7.38        | 0.45        | 2.61E-02 | 6.36E-02         |
| <i>CACNA1A</i>  | 4.81       | 10.24       | 0.47        | 1.84E-02 | 5.15E-02         |
| <i>PLA2G4C</i>  | 2.97       | 6.31        | 0.47        | 1.65E-02 | 4.80E-02         |
| <i>MAPK8IP1</i> | 3.49       | 7.37        | 0.47        | 1.14E-02 | 3.71E-02         |
| <i>FGFR2</i>    | 50.25      | 104.08      | 0.48        | 4.41E-04 | 3.32E-03         |
| <i>CACNA2D3</i> | 1.73       | 3.58        | 0.48        | 1.27E-01 | 2.15E-01         |
| <i>CACNB2</i>   | 27.73      | 55.61       | 0.50        | 8.28E-05 | 9.07E-04         |
| <i>FGF13</i>    | 2.41       | 4.81        | 0.50        | 1.17E-01 | 2.03E-01         |
| <i>FOS</i>      | 205.26     | 406.32      | 0.51        | 1.13E-03 | 6.65E-03         |
| <i>CACNA1H</i>  | 41.94      | 82.05       | 0.51        | 5.36E-04 | 3.82E-03         |
| <i>PDGFA</i>    | 28.32      | 53.67       | 0.53        | 1.77E-04 | 1.69E-03         |
| <i>DUSP1</i>    | 68.42      | 128.35      | 0.53        | 1.82E-04 | 1.69E-03         |
| <i>NR4A1</i>    | 146.87     | 264.51      | 0.56        | 7.12E-04 | 4.63E-03         |
| <i>MAPT</i>     | 4.07       | 7.19        | 0.57        | 1.33E-02 | 4.10E-02         |
| <i>RASGRP4</i>  | 5.72       | 10.06       | 0.57        | 1.90E-02 | 5.26E-02         |
| <i>FGF20</i>    | 0.21       | 0.36        | 0.57        | 5.95E-01 | 6.96E-01         |
| <i>IL1R1</i>    | 59.97      | 104.13      | 0.58        | 3.68E-04 | 3.00E-03         |
| <i>MAP2K6</i>   | 23.79      | 41.27       | 0.58        | 5.02E-03 | 2.05E-02         |
| <i>BDNF</i>     | 4.88       | 8.44        | 0.58        | 3.64E-02 | 8.21E-02         |
| <i>FGF5</i>     | 1.21       | 2.06        | 0.59        | 3.38E-01 | 4.70E-01         |

|                 |        |        |      |          |          |
|-----------------|--------|--------|------|----------|----------|
| <i>HSPA1L</i>   | 1.68   | 2.86   | 0.59 | 8.39E-02 | 1.59E-01 |
| <i>TGFBR2</i>   | 116.38 | 192.01 | 0.61 | 7.63E-06 | 1.53E-04 |
| <i>FGF2</i>     | 10.70  | 17.36  | 0.62 | 5.27E-03 | 2.09E-02 |
| <i>JUND</i>     | 120.45 | 195.17 | 0.62 | 2.29E-05 | 3.95E-04 |
| <i>CACNA2D2</i> | 10.62  | 16.93  | 0.63 | 1.11E-01 | 1.96E-01 |
| <i>GADD45G</i>  | 2.45   | 3.90   | 0.63 | 1.09E-01 | 1.95E-01 |
| <i>PTPN7</i>    | 21.73  | 34.22  | 0.63 | 3.24E-02 | 7.50E-02 |
| <i>HSPA1A</i>   | 12.47  | 19.20  | 0.65 | 1.08E-01 | 1.94E-01 |
| <i>RASGRP3</i>  | 33.14  | 50.67  | 0.65 | 5.43E-03 | 2.11E-02 |
| <i>CACNA2D4</i> | 10.32  | 15.62  | 0.66 | 9.76E-02 | 1.81E-01 |
| <i>FGFR1</i>    | 46.60  | 67.87  | 0.69 | 6.53E-03 | 2.38E-02 |
| <i>RAP1A</i>    | 63.20  | 91.99  | 0.69 | 3.27E-04 | 2.82E-03 |
| <i>FGF12</i>    | 1.08   | 1.57   | 0.69 | 4.73E-01 | 5.91E-01 |
| <i>FGF19</i>    | 0.16   | 0.23   | 0.69 | 5.49E-01 | 6.65E-01 |
| <i>MAP3K14</i>  | 35.95  | 51.93  | 0.69 | 4.17E-03 | 1.83E-02 |
| <i>GADD45B</i>  | 10.44  | 14.69  | 0.71 | 9.38E-02 | 1.75E-01 |
| <i>MECOM</i>    | 144.62 | 203.21 | 0.71 | 2.25E-02 | 5.70E-02 |
| <i>MKNK1</i>    | 70.02  | 98.03  | 0.71 | 4.08E-05 | 5.79E-04 |
| <i>SOS2</i>     | 94.63  | 131.76 | 0.72 | 4.07E-03 | 1.81E-02 |
| <i>MAPK3</i>    | 64.20  | 89.11  | 0.72 | 1.31E-02 | 4.10E-02 |
| <i>RAC2</i>     | 34.34  | 47.65  | 0.72 | 3.04E-02 | 7.21E-02 |
| <i>HSPA2</i>    | 6.54   | 9.05   | 0.72 | 2.13E-01 | 3.30E-01 |
| <i>FAS</i>      | 44.41  | 61.21  | 0.73 | 3.67E-03 | 1.67E-02 |
| <i>CACNA1B</i>  | 2.76   | 3.79   | 0.73 | 3.98E-01 | 5.36E-01 |
| <i>RPS6KA5</i>  | 22.69  | 31.08  | 0.73 | 1.69E-02 | 4.85E-02 |
| <i>FGF7</i>     | 8.70   | 11.78  | 0.74 | 2.20E-01 | 3.34E-01 |
| <i>MAP4K2</i>   | 16.00  | 21.65  | 0.74 | 1.03E-01 | 1.88E-01 |
| <i>NFATC1</i>   | 21.38  | 28.63  | 0.75 | 1.63E-01 | 2.66E-01 |
| <i>DUSP2</i>    | 7.44   | 9.90   | 0.75 | 2.26E-01 | 3.37E-01 |
| <i>ARRB1</i>    | 56.54  | 75.00  | 0.75 | 2.93E-02 | 7.07E-02 |
| <i>CACNG4</i>   | 0.29   | 0.39   | 0.75 | 6.39E-01 | 7.30E-01 |
| <i>RRAS</i>     | 14.08  | 18.58  | 0.76 | 5.35E-02 | 1.11E-01 |
| <i>TNF</i>      | 2.01   | 2.65   | 0.76 | 4.33E-01 | 5.56E-01 |
| <i>MAP3K3</i>   | 39.77  | 52.38  | 0.76 | 5.28E-03 | 2.09E-02 |
| <i>RASGRP1</i>  | 38.77  | 50.87  | 0.76 | 5.71E-03 | 2.19E-02 |
| <i>MAPK7</i>    | 23.12  | 30.07  | 0.77 | 6.21E-03 | 2.30E-02 |
| <i>DUSP16</i>   | 69.34  | 89.76  | 0.77 | 2.06E-03 | 1.06E-02 |
| <i>MAP2K5</i>   | 30.64  | 39.58  | 0.77 | 5.87E-03 | 2.21E-02 |
| <i>CACNB4</i>   | 10.31  | 13.29  | 0.78 | 4.38E-01 | 5.56E-01 |
| <i>GNG12</i>    | 145.10 | 185.53 | 0.78 | 1.04E-02 | 3.43E-02 |
| <i>MAPK13</i>   | 47.20  | 60.09  | 0.79 | 1.03E-02 | 3.43E-02 |
| <i>PRKCA</i>    | 64.36  | 81.82  | 0.79 | 5.29E-02 | 1.11E-01 |
| <i>CACNA1C</i>  | 45.89  | 58.11  | 0.79 | 2.23E-01 | 3.34E-01 |
| <i>DUSP8</i>    | 35.32  | 44.69  | 0.79 | 1.20E-01 | 2.06E-01 |
| <i>MAPK8IP3</i> | 114.91 | 144.38 | 0.80 | 3.43E-03 | 1.59E-02 |
| <i>JUN</i>      | 132.30 | 166.08 | 0.80 | 6.57E-02 | 1.33E-01 |
| <i>MKNK2</i>    | 174.51 | 218.84 | 0.80 | 2.05E-02 | 5.44E-02 |
| <i>STK4</i>     | 143.21 | 179.37 | 0.80 | 3.11E-03 | 1.49E-02 |
| <i>MAP3K11</i>  | 102.63 | 128.22 | 0.80 | 2.79E-03 | 1.40E-02 |
| <i>AKT3</i>     | 44.94  | 56.10  | 0.80 | 1.11E-01 | 1.96E-01 |
| <i>MAP3K13</i>  | 96.45  | 119.88 | 0.80 | 4.30E-03 | 1.83E-02 |
| <i>RPS6KA1</i>  | 103.34 | 125.35 | 0.82 | 4.01E-02 | 8.86E-02 |
| <i>NTF3</i>     | 1.59   | 1.92   | 0.83 | 7.00E-01 | 7.72E-01 |

|                      |        |        |      |          |          |
|----------------------|--------|--------|------|----------|----------|
| <i>PPP3CC</i>        | 19.95  | 23.98  | 0.83 | 2.52E-01 | 3.68E-01 |
| <i>NTRK1</i>         | 3.23   | 3.88   | 0.83 | 6.69E-01 | 7.53E-01 |
| <i>RPS6KA2</i>       | 47.76  | 57.28  | 0.83 | 1.33E-01 | 2.22E-01 |
| <i>PLA2G4B</i>       | 32.21  | 38.53  | 0.84 | 1.20E-01 | 2.06E-01 |
| <i>TAB2</i>          | 145.87 | 174.26 | 0.84 | 1.47E-02 | 4.43E-02 |
| <i>CD14</i>          | 10.50  | 12.53  | 0.84 | 3.73E-01 | 5.13E-01 |
| <i>IKKBK</i>         | 120.32 | 143.21 | 0.84 | 2.52E-02 | 6.19E-02 |
| <i>PPM1A</i>         | 143.37 | 170.27 | 0.84 | 2.43E-02 | 6.09E-02 |
| <i>CACNB3</i>        | 25.34  | 29.87  | 0.85 | 2.22E-01 | 3.34E-01 |
| <i>RPS6KA3</i>       | 216.86 | 253.05 | 0.86 | 3.52E-02 | 8.08E-02 |
| <i>PRKACA</i>        | 53.19  | 61.49  | 0.86 | 4.61E-02 | 1.01E-01 |
| <i>RAP1B</i>         | 83.08  | 95.88  | 0.87 | 4.99E-02 | 1.07E-01 |
| <i>TAOK3</i>         | 124.49 | 143.40 | 0.87 | 9.22E-02 | 1.74E-01 |
| <i>MAP2K2</i>        | 64.51  | 73.95  | 0.87 | 1.65E-01 | 2.66E-01 |
| <i>RRAS2</i>         | 29.07  | 33.25  | 0.87 | 3.10E-01 | 4.34E-01 |
| <i>SOS1</i>          | 179.60 | 204.67 | 0.88 | 1.18E-02 | 3.80E-02 |
| <i>RELB</i>          | 26.30  | 29.93  | 0.88 | 2.05E-01 | 3.18E-01 |
| <i>MAP3K2</i>        | 211.92 | 240.77 | 0.88 | 6.85E-02 | 1.36E-01 |
| <i>MAP2K7</i>        | 48.78  | 54.69  | 0.89 | 9.89E-02 | 1.82E-01 |
| <i>EGFR</i>          | 190.81 | 213.26 | 0.89 | 1.41E-01 | 2.35E-01 |
| <i>FLNB</i>          | 877.22 | 967.82 | 0.91 | 2.88E-01 | 4.18E-01 |
| <i>JMJD7-PLA2G4B</i> | 57.41  | 63.27  | 0.91 | 3.72E-01 | 5.13E-01 |
| <i>CACNB1</i>        | 16.47  | 18.04  | 0.91 | 6.03E-01 | 6.99E-01 |
| <i>IL1R2</i>         | 12.48  | 13.65  | 0.91 | 7.35E-01 | 7.98E-01 |
| <i>GRB2</i>          | 111.23 | 120.87 | 0.92 | 1.82E-01 | 2.87E-01 |
| <i>PPM1B</i>         | 87.83  | 95.43  | 0.92 | 2.99E-01 | 4.27E-01 |
| <i>NLK</i>           | 47.66  | 51.11  | 0.93 | 3.80E-01 | 5.19E-01 |
| <i>RASGRF2</i>       | 31.74  | 33.67  | 0.94 | 7.14E-01 | 7.82E-01 |
| <i>MAP3K12</i>       | 51.43  | 54.46  | 0.94 | 5.13E-01 | 6.35E-01 |
| <i>FLNC</i>          | 44.34  | 46.63  | 0.95 | 7.85E-01 | 8.45E-01 |
| <i>TNFRSF1A</i>      | 111.85 | 116.86 | 0.96 | 5.80E-01 | 6.88E-01 |
| <i>CACNA2D1</i>      | 13.91  | 14.51  | 0.96 | 8.36E-01 | 8.79E-01 |
| <i>MAPK14</i>        | 128.95 | 134.12 | 0.96 | 4.18E-01 | 5.45E-01 |
| <i>TAOK2</i>         | 85.17  | 88.57  | 0.96 | 5.36E-01 | 6.52E-01 |
| <i>CACNA1D</i>       | 71.23  | 73.98  | 0.96 | 7.82E-01 | 8.45E-01 |
| <i>RASA2</i>         | 81.27  | 83.82  | 0.97 | 7.01E-01 | 7.72E-01 |
| <i>MAX</i>           | 86.79  | 88.36  | 0.98 | 8.24E-01 | 8.74E-01 |
| <i>MAP3K1</i>        | 92.80  | 94.41  | 0.98 | 8.01E-01 | 8.58E-01 |
| <i>ATF2</i>          | 78.40  | 78.90  | 0.99 | 9.37E-01 | 9.61E-01 |
| <i>ECSIT</i>         | 18.04  | 18.11  | 1.00 | 9.78E-01 | 9.94E-01 |
| <i>RAF1</i>          | 143.83 | 143.94 | 1.00 | 9.89E-01 | 9.96E-01 |
| <i>DUSP3</i>         | 82.73  | 82.76  | 1.00 | 9.94E-01 | 9.96E-01 |
| <i>NFATC3</i>        | 165.66 | 165.72 | 1.00 | 9.96E-01 | 9.96E-01 |
| <i>LAMTOR3</i>       | 35.75  | 35.66  | 1.00 | 9.82E-01 | 9.95E-01 |
| <i>MAPK9</i>         | 74.49  | 74.05  | 1.01 | 9.36E-01 | 9.61E-01 |
| <i>TAB1</i>          | 31.07  | 30.81  | 1.01 | 9.22E-01 | 9.57E-01 |
| <i>MAPKAPK2</i>      | 122.04 | 120.48 | 1.01 | 8.53E-01 | 8.89E-01 |
| <i>RASA1</i>         | 143.79 | 141.63 | 1.02 | 8.39E-01 | 8.79E-01 |
| <i>CACNA1E</i>       | 9.44   | 9.25   | 1.02 | 9.47E-01 | 9.68E-01 |
| <i>PPP3CB</i>        | 70.38  | 68.91  | 1.02 | 7.31E-01 | 7.97E-01 |
| <i>ELK4</i>          | 286.78 | 277.98 | 1.03 | 6.26E-01 | 7.19E-01 |
| <i>MAPK8IP2</i>      | 2.83   | 2.75   | 1.03 | 9.34E-01 | 9.61E-01 |
| <i>TRAF6</i>         | 40.34  | 38.97  | 1.04 | 6.87E-01 | 7.67E-01 |

|                 |        |        |      |          |          |
|-----------------|--------|--------|------|----------|----------|
| <i>RAPGEF2</i>  | 144.92 | 139.32 | 1.04 | 5.62E-01 | 6.74E-01 |
| <i>MAP3K4</i>   | 72.29  | 69.48  | 1.04 | 6.25E-01 | 7.19E-01 |
| <i>MAP3K7</i>   | 70.84  | 67.81  | 1.04 | 5.91E-01 | 6.96E-01 |
| <i>DAXX</i>     | 34.38  | 32.89  | 1.05 | 6.55E-01 | 7.41E-01 |
| <i>ARRB2</i>    | 42.91  | 40.93  | 1.05 | 6.99E-01 | 7.72E-01 |
| <i>MRAS</i>     | 14.58  | 13.91  | 1.05 | 8.07E-01 | 8.61E-01 |
| <i>AKT2</i>     | 136.94 | 130.43 | 1.05 | 4.35E-01 | 5.56E-01 |
| <i>TGFB2</i>    | 8.90   | 8.43   | 1.06 | 8.27E-01 | 8.74E-01 |
| <i>MAPK8</i>    | 75.77  | 71.01  | 1.07 | 3.89E-01 | 5.27E-01 |
| <i>CDC42</i>    | 169.50 | 158.13 | 1.07 | 2.22E-01 | 3.34E-01 |
| <i>CRK</i>      | 131.17 | 122.31 | 1.07 | 2.29E-01 | 3.38E-01 |
| <i>FGFR4</i>    | 50.39  | 46.89  | 1.07 | 6.85E-01 | 7.67E-01 |
| <i>KRAS</i>     | 142.77 | 132.38 | 1.08 | 3.09E-01 | 4.34E-01 |
| <i>BRAF</i>     | 57.47  | 53.28  | 1.08 | 3.81E-01 | 5.19E-01 |
| <i>NFKB2</i>    | 57.81  | 53.57  | 1.08 | 4.53E-01 | 5.72E-01 |
| <i>PPP5C</i>    | 64.57  | 59.71  | 1.08 | 2.23E-01 | 3.34E-01 |
| <i>NRAS</i>     | 100.87 | 93.26  | 1.08 | 2.99E-01 | 4.27E-01 |
| <i>SRF</i>      | 67.27  | 61.98  | 1.09 | 4.03E-01 | 5.38E-01 |
| <i>MAPKAPK3</i> | 35.59  | 32.67  | 1.09 | 4.70E-01 | 5.90E-01 |
| <i>TGFB3</i>    | 17.21  | 15.77  | 1.09 | 6.54E-01 | 7.41E-01 |
| <i>MAPK1</i>    | 215.16 | 195.12 | 1.10 | 6.55E-02 | 1.33E-01 |
| <i>MAPK11</i>   | 9.07   | 8.19   | 1.11 | 5.77E-01 | 6.88E-01 |
| <i>PTPRR</i>    | 16.57  | 14.91  | 1.11 | 5.94E-01 | 6.96E-01 |
| <i>NF1</i>      | 330.31 | 296.25 | 1.11 | 5.00E-02 | 1.07E-01 |
| <i>RELA</i>     | 77.61  | 69.46  | 1.12 | 1.64E-01 | 2.66E-01 |
| <i>MAPK12</i>   | 54.91  | 49.06  | 1.12 | 3.02E-01 | 4.28E-01 |
| <i>NFKB1</i>    | 101.45 | 90.62  | 1.12 | 1.14E-01 | 1.99E-01 |
| <i>PDGFB</i>    | 16.69  | 14.83  | 1.13 | 5.60E-01 | 6.74E-01 |
| <i>GADD45A</i>  | 14.62  | 12.89  | 1.13 | 4.07E-01 | 5.39E-01 |
| <i>RAC1</i>     | 152.46 | 134.03 | 1.14 | 7.65E-02 | 1.47E-01 |
| <i>DUSP6</i>    | 90.61  | 79.34  | 1.14 | 2.92E-01 | 4.22E-01 |
| <i>TAOK1</i>    | 158.61 | 137.70 | 1.15 | 3.82E-02 | 8.51E-02 |
| <i>MAP4K4</i>   | 126.85 | 109.98 | 1.15 | 2.50E-01 | 3.67E-01 |
| <i>FLNA</i>     | 911.82 | 785.16 | 1.16 | 1.72E-01 | 2.75E-01 |
| <i>CASP3</i>    | 61.68  | 52.95  | 1.16 | 1.25E-01 | 2.12E-01 |
| <i>FGF11</i>    | 7.70   | 6.28   | 1.23 | 4.36E-01 | 5.56E-01 |
| <i>MAP2K3</i>   | 92.77  | 75.65  | 1.23 | 4.69E-02 | 1.02E-01 |
| <i>MAP2K4</i>   | 40.36  | 32.83  | 1.23 | 2.46E-02 | 6.12E-02 |
| <i>MAP4K3</i>   | 72.55  | 58.66  | 1.24 | 1.56E-02 | 4.65E-02 |
| <i>PAK2</i>     | 188.08 | 152.03 | 1.24 | 1.32E-02 | 4.10E-02 |
| <i>IKBKG</i>    | 4.38   | 3.53   | 1.24 | 5.30E-01 | 6.48E-01 |
| <i>TRAF2</i>    | 37.45  | 30.19  | 1.24 | 6.14E-02 | 1.27E-01 |
| <i>AKT1</i>     | 181.80 | 143.79 | 1.26 | 3.16E-03 | 1.49E-02 |
| <i>RPS6KA4</i>  | 47.40  | 37.42  | 1.27 | 1.95E-02 | 5.34E-02 |
| <i>TGFB1</i>    | 55.19  | 43.50  | 1.27 | 6.77E-02 | 1.36E-01 |
| <i>PPP3CA</i>   | 117.24 | 92.35  | 1.27 | 2.15E-02 | 5.52E-02 |
| <i>MAP3K8</i>   | 28.28  | 22.27  | 1.27 | 1.06E-01 | 1.92E-01 |
| <i>MAP3K5</i>   | 96.59  | 75.74  | 1.28 | 3.05E-02 | 7.21E-02 |
| <i>GNA12</i>    | 65.63  | 51.21  | 1.28 | 7.64E-03 | 2.75E-02 |
| <i>MAP3K6</i>   | 32.58  | 25.29  | 1.29 | 7.11E-02 | 1.41E-01 |
| <i>FGF1</i>     | 3.37   | 2.61   | 1.29 | 4.17E-01 | 5.45E-01 |
| <i>CHUK</i>     | 58.66  | 45.28  | 1.30 | 8.65E-03 | 2.98E-02 |
| <i>MAP2K1</i>   | 39.05  | 30.06  | 1.30 | 1.99E-02 | 5.39E-02 |

|                 |        |        |      |          |          |
|-----------------|--------|--------|------|----------|----------|
| <i>PAK1</i>     | 126.76 | 97.11  | 1.31 | 9.31E-04 | 5.75E-03 |
| <i>ATF4</i>     | 146.18 | 111.12 | 1.32 | 8.17E-03 | 2.90E-02 |
| <i>MAPKAPK5</i> | 53.65  | 40.11  | 1.34 | 1.63E-02 | 4.80E-02 |
| <i>HSPB1</i>    | 57.54  | 42.49  | 1.35 | 3.08E-02 | 7.21E-02 |
| <i>FASLG</i>    | 2.80   | 2.04   | 1.37 | 4.85E-01 | 6.03E-01 |
| <i>PLA2G4D</i>  | 0.88   | 0.64   | 1.39 | 5.98E-01 | 6.96E-01 |
| <i>PRKCG</i>    | 8.99   | 6.45   | 1.39 | 4.37E-01 | 5.56E-01 |
| <i>ELK1</i>     | 47.43  | 33.83  | 1.40 | 4.40E-03 | 1.83E-02 |
| <i>CRKL</i>     | 140.74 | 100.17 | 1.40 | 1.28E-06 | 4.95E-05 |
| <i>PDGFRB</i>   | 124.27 | 88.24  | 1.41 | 1.37E-02 | 4.18E-02 |
| <i>NTF4</i>     | 0.12   | 0.08   | 1.45 | 5.27E-01 | 6.48E-01 |
| <i>CACNG8</i>   | 13.55  | 9.29   | 1.46 | 4.16E-01 | 5.45E-01 |
| <i>TGFBR1</i>   | 128.74 | 87.37  | 1.47 | 3.73E-04 | 3.00E-03 |
| <i>PPP3R1</i>   | 106.28 | 71.76  | 1.48 | 5.94E-07 | 4.77E-05 |
| <i>FGF17</i>    | 1.62   | 1.07   | 1.52 | 4.04E-01 | 5.38E-01 |
| <i>DDIT3</i>    | 12.31  | 8.04   | 1.53 | 2.09E-02 | 5.44E-02 |
| <i>DUSP7</i>    | 27.70  | 17.68  | 1.57 | 2.88E-03 | 1.42E-02 |
| <i>RAC3</i>     | 3.75   | 2.35   | 1.59 | 1.68E-01 | 2.70E-01 |
| <i>TP53</i>     | 138.21 | 72.39  | 1.91 | 7.60E-07 | 4.77E-05 |
| <i>HRAS</i>     | 24.90  | 12.98  | 1.92 | 6.66E-06 | 1.46E-04 |
| <i>HSPA1B</i>   | 81.97  | 42.07  | 1.95 | 5.00E-05 | 6.34E-04 |
| <i>STK3</i>     | 65.27  | 33.16  | 1.97 | 1.98E-05 | 3.67E-04 |
| <i>IL1B</i>     | 40.36  | 19.60  | 2.06 | 4.36E-03 | 1.83E-02 |
| <i>IL1A</i>     | 7.60   | 3.63   | 2.09 | 1.82E-02 | 5.15E-02 |
| <i>HSPA8</i>    | 712.76 | 320.23 | 2.23 | 1.30E-06 | 4.95E-05 |
| <i>CDC25B</i>   | 173.03 | 75.19  | 2.30 | 1.25E-07 | 3.02E-05 |
| <i>MYC</i>      | 111.44 | 45.58  | 2.44 | 7.91E-07 | 4.77E-05 |
| <i>STMN1</i>    | 112.01 | 45.77  | 2.45 | 2.18E-06 | 5.83E-05 |
| <i>PLA2G4A</i>  | 18.70  | 6.93   | 2.70 | 2.07E-03 | 1.06E-02 |
| <i>DUSP10</i>   | 38.03  | 13.84  | 2.75 | 5.46E-05 | 6.57E-04 |
| <i>HSPA6</i>    | 6.42   | 2.29   | 2.81 | 2.03E-03 | 1.06E-02 |
| <i>DUSP4</i>    | 168.39 | 44.58  | 3.78 | 6.75E-05 | 7.75E-04 |
